# Supplementary material for: Palladium-catalyzed carbonylative synthesis of isocoumarins and phthalides by using phenyl formate as a carbon monoxide source
Source: Royal Society of Chemistry journal article supplement (doi:10.1039/c6ob02409b), 2017-01-01
Supplement: c6ob02409b1.pdf [file c6ob02409b1.pdf]

## Supporting information

# Palladium-Catalyzed Carbonylative Synthesis of Isocoumarins and Phthalides by using Phenyl Formate as a Carbon Monoxide Source

Qing Yuan, Zhen-Bang Chen , Fang-Ling Zhang and Yong-Ming Zhu \*

College of Pharmaceutical Sciences, Soochow University, Suzhou, 215123, China.

E-mail: zhuyongming@suda.edu.cn

## Table of Contents

|                                                                                         |         |
|-----------------------------------------------------------------------------------------|---------|
| Copies of $^1\text{H}$ and $^{13}\text{C}$ NMR Spectra for Compounds <b>3a-3s</b> ----- | S2-S20  |
| Copies of $^1\text{H}$ and $^{13}\text{C}$ NMR Spectra for Compounds <b>5a-5i</b> ----- | S21-S29 |

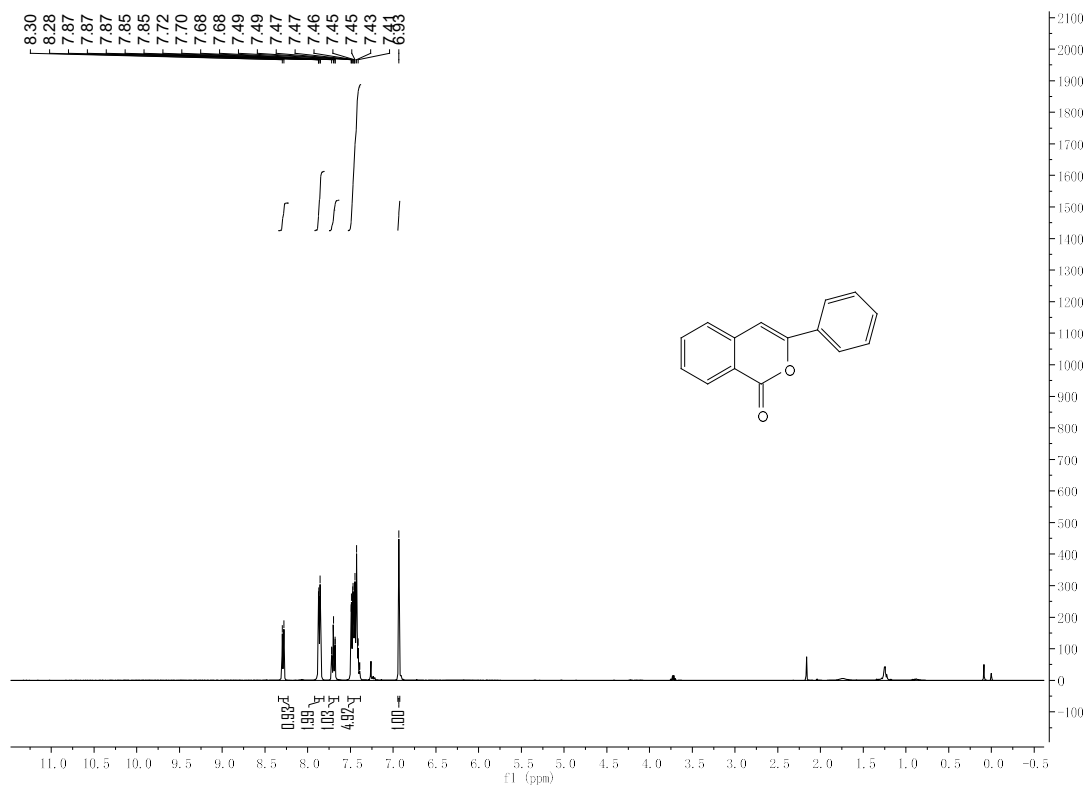

**<sup>1</sup>H NMR Spectrum of Compound 3a**

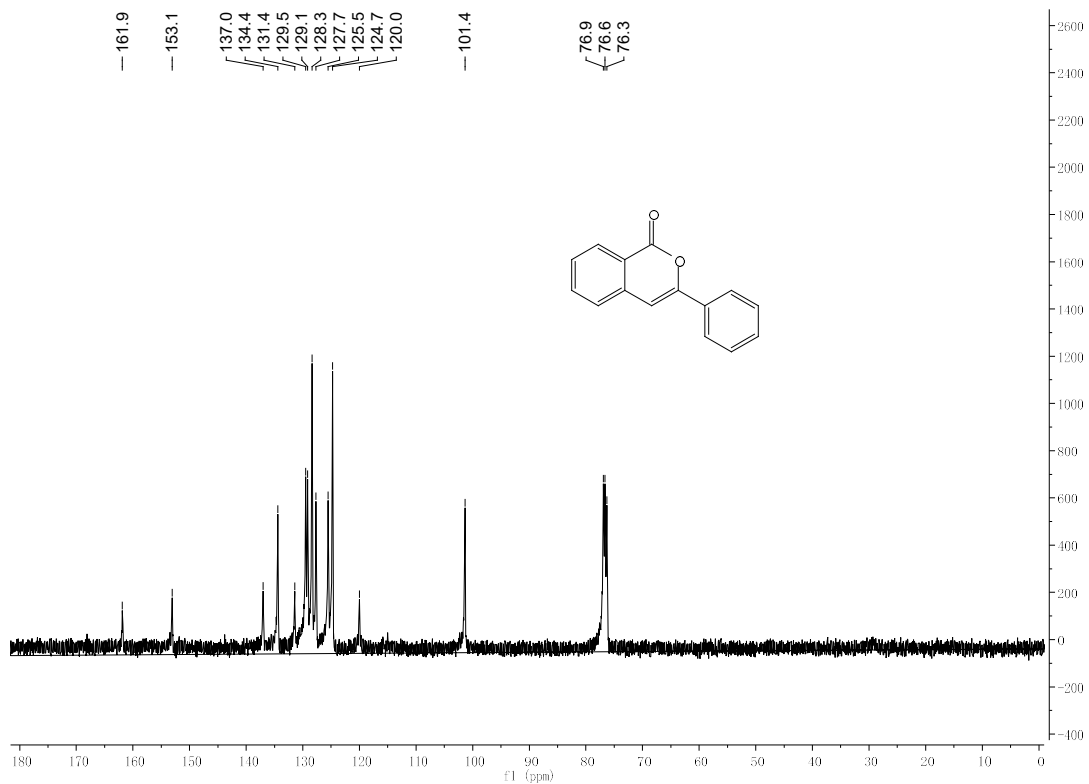

**<sup>13</sup>C NMR Spectrum of Compound 3a**

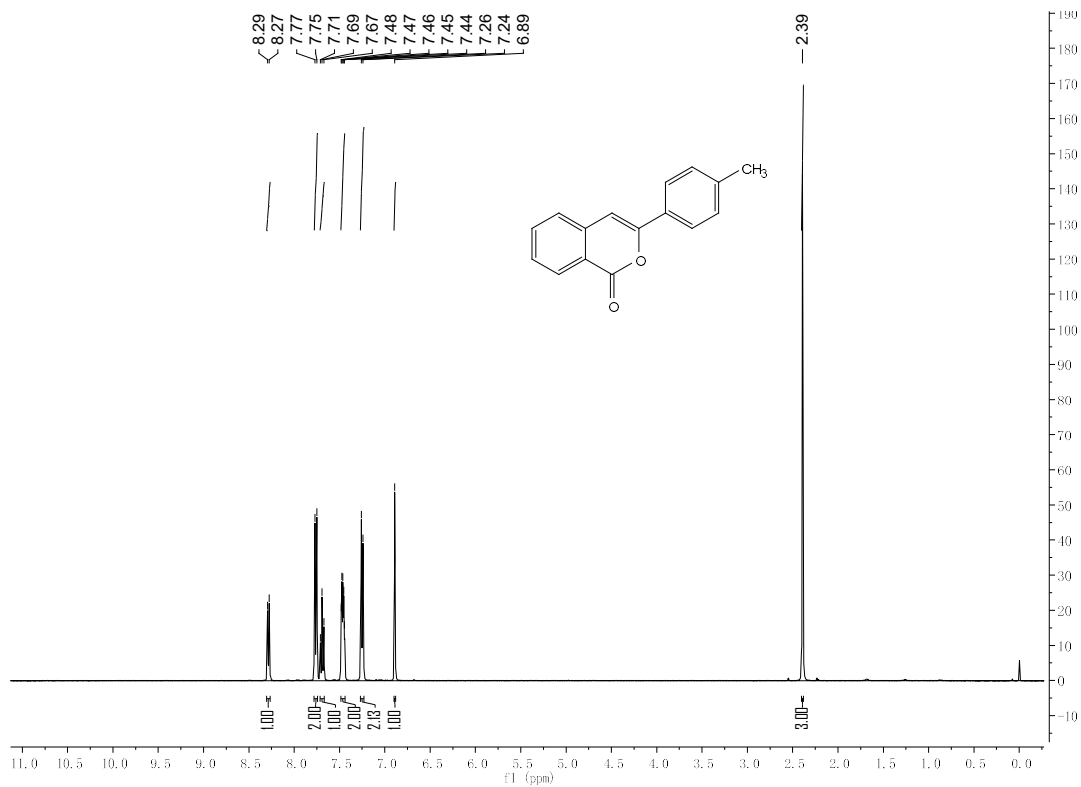

**<sup>1</sup>H NMR Spectrum of Compound 3b**

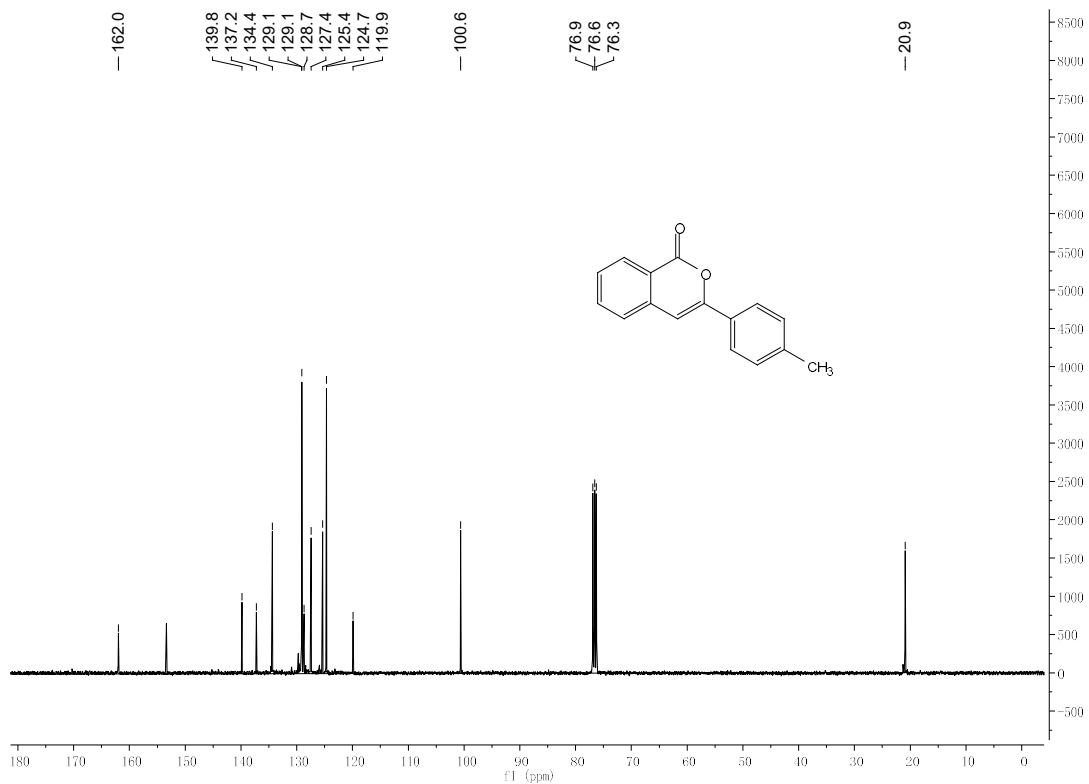

**<sup>13</sup>C NMR Spectrum of Compound 3b**

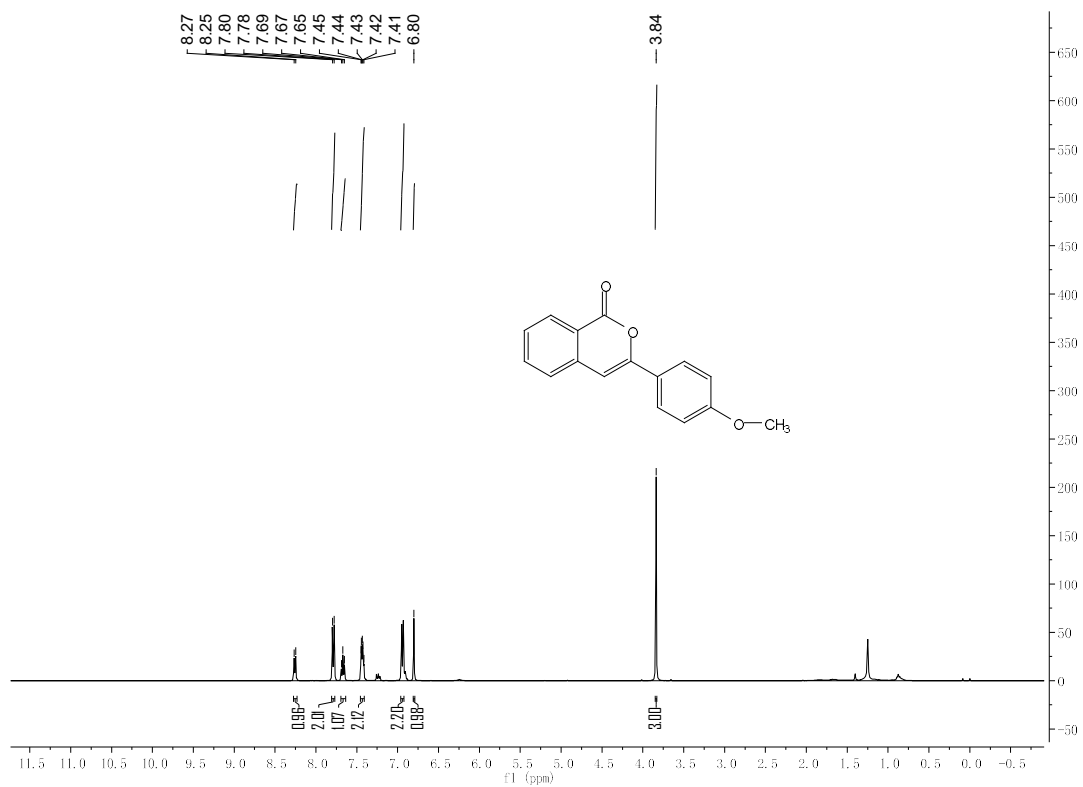

**<sup>1</sup>H NMR Spectrum of Compound 3c**

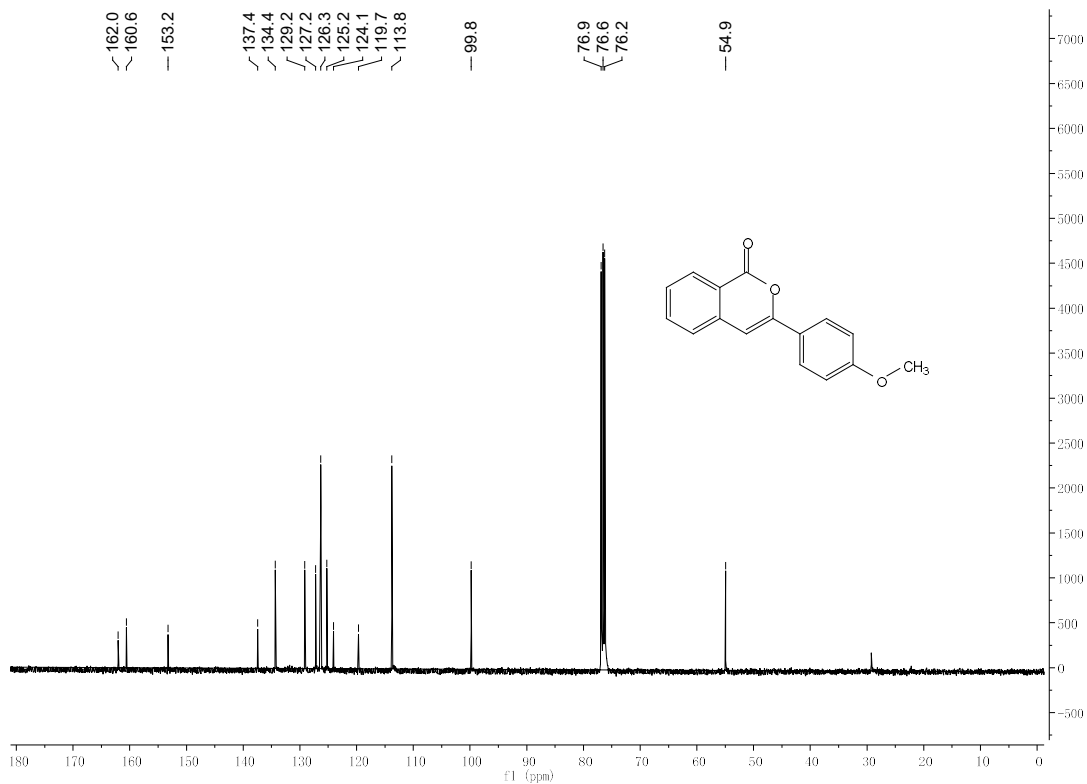

**<sup>13</sup>C NMR Spectrum of Compound 3c**

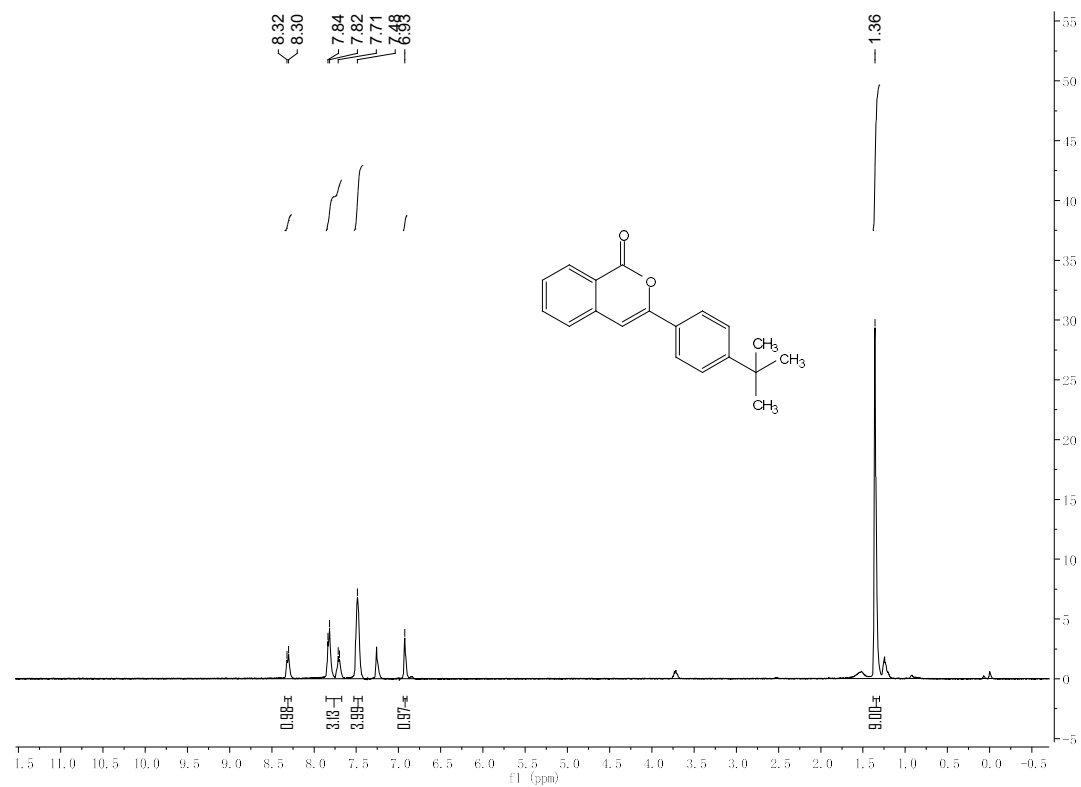

**<sup>1</sup>H NMR Spectrum of Compound 3d**

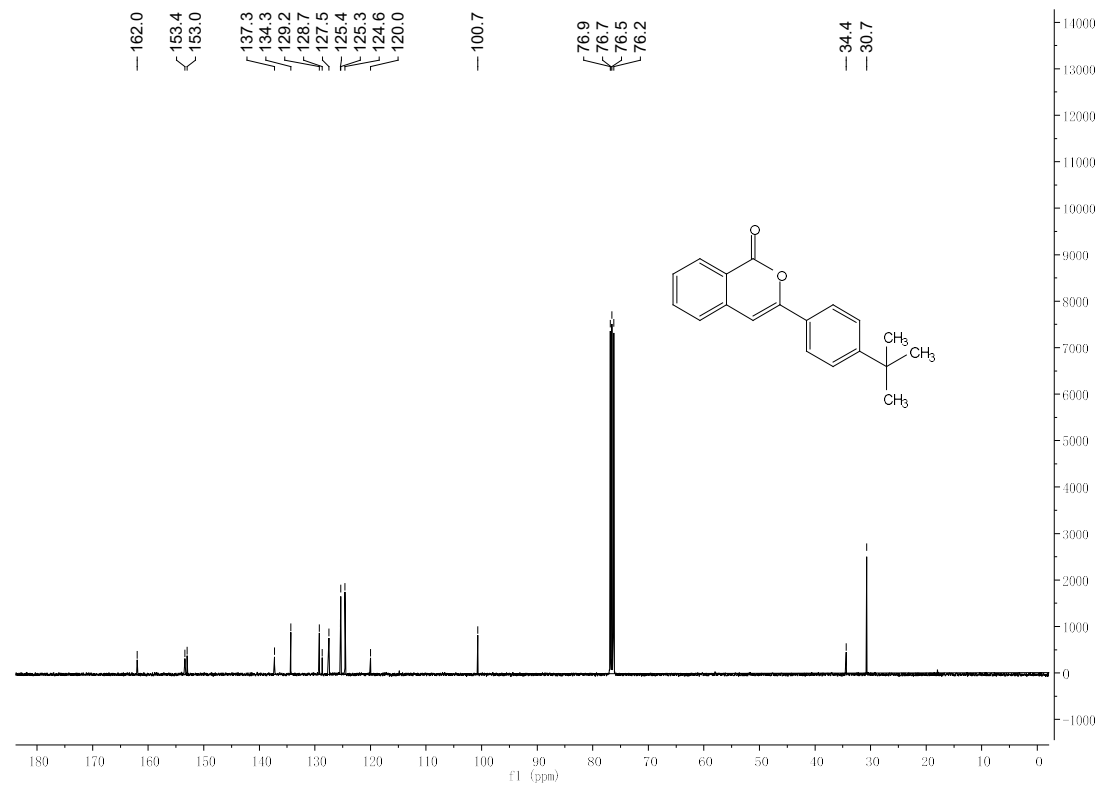

**<sup>13</sup>C NMR Spectrum of Compound 3d**

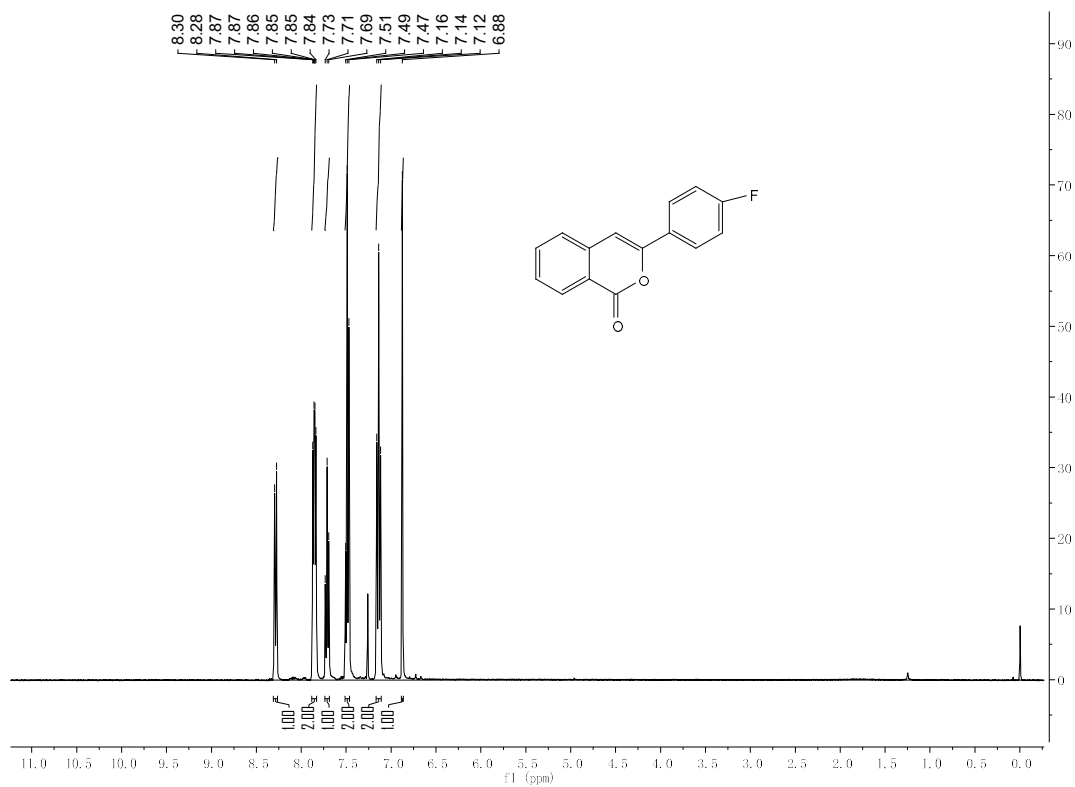

**<sup>1</sup>H NMR Spectrum of Compound 3e**

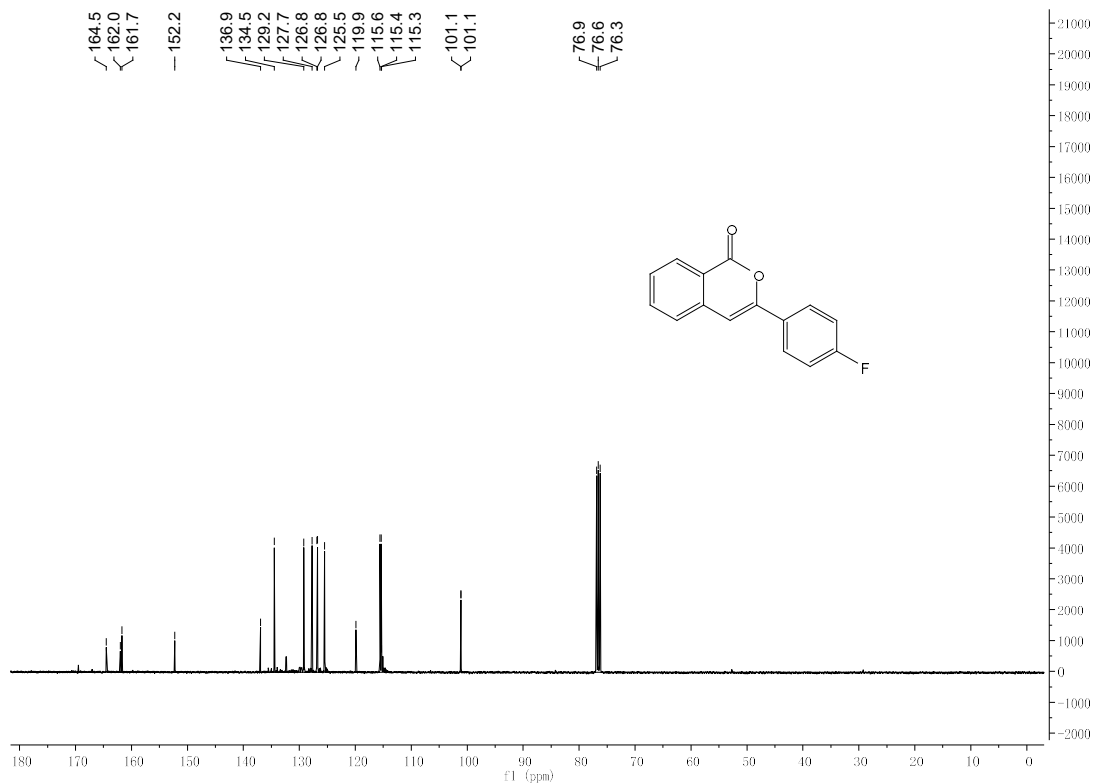

**<sup>13</sup>C NMR Spectrum of Compound 3e**

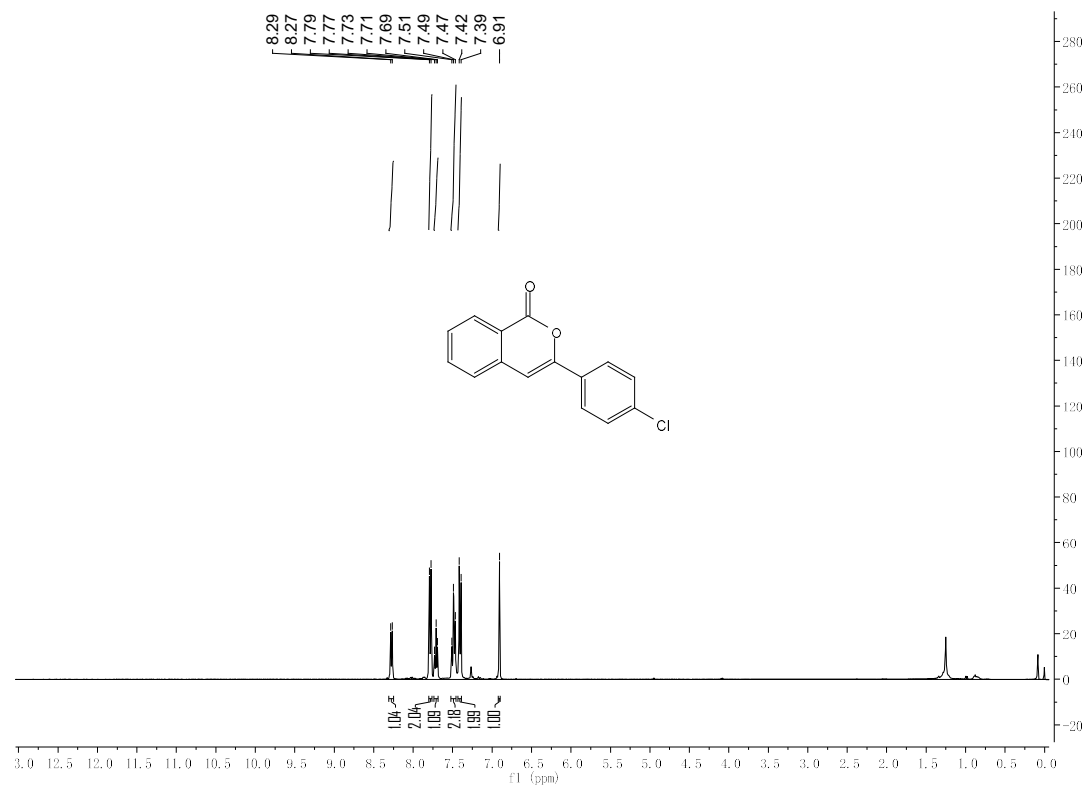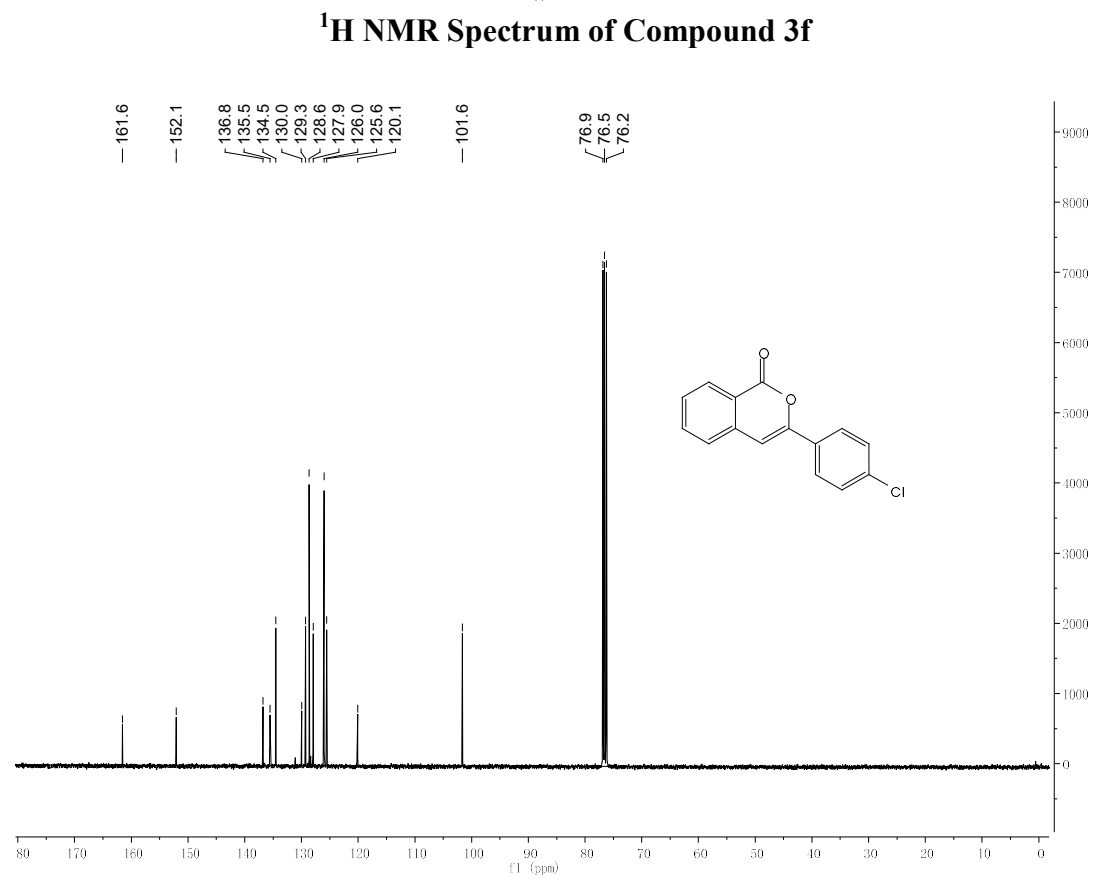

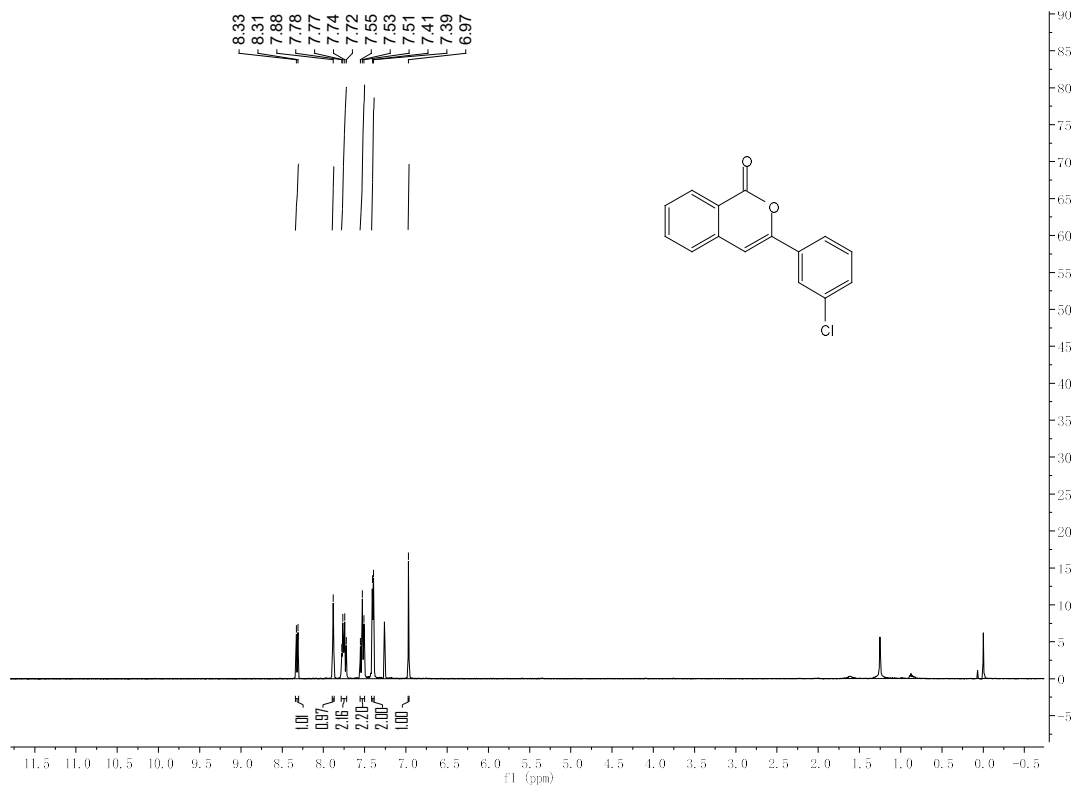

**<sup>1</sup>H NMR Spectrum of Compound 3g**

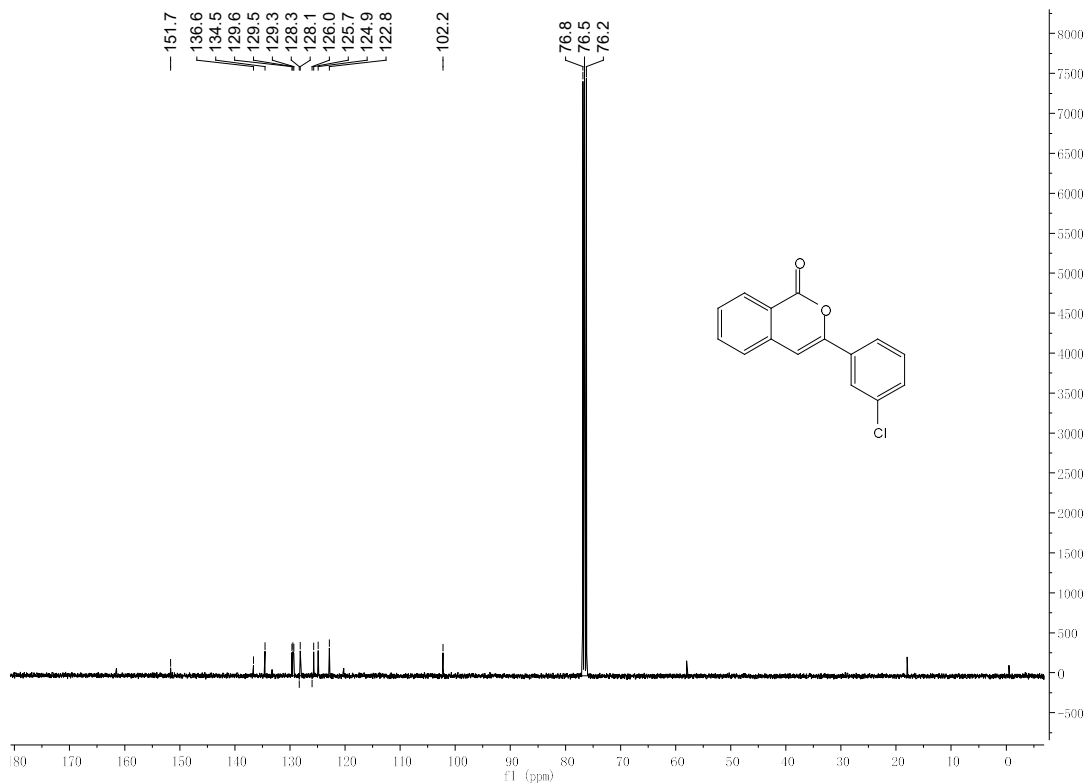

**<sup>13</sup>C NMR Spectrum of Compound 3g**



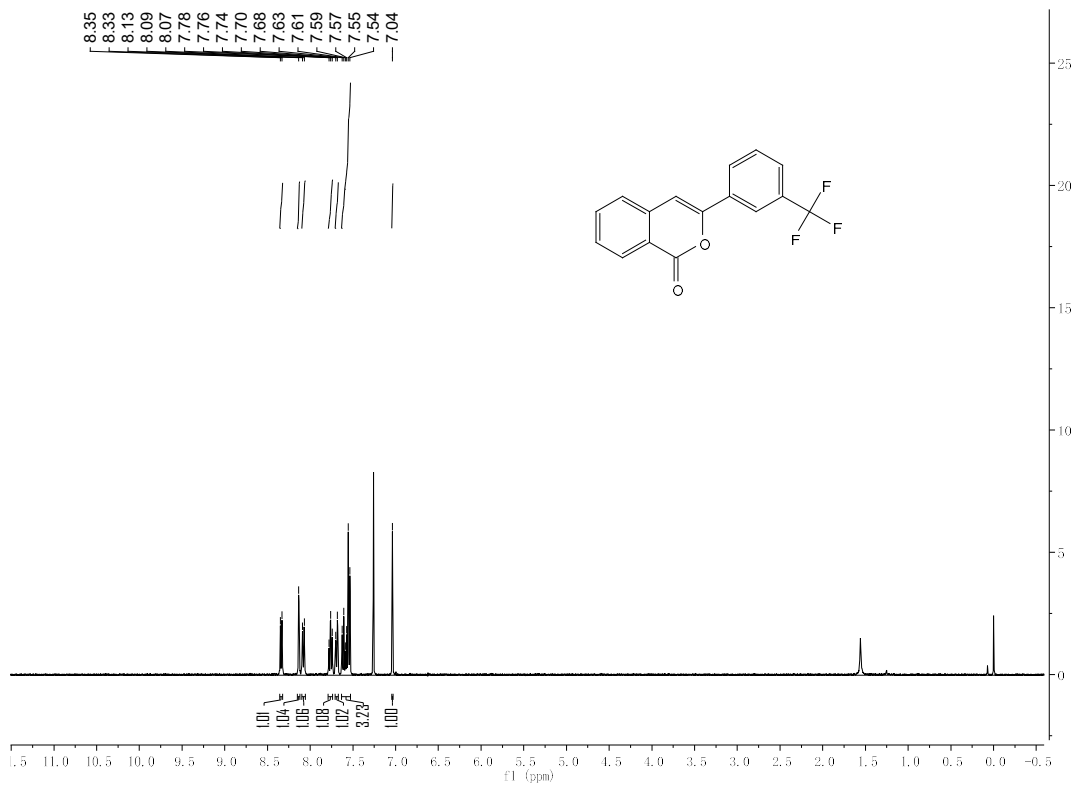

**<sup>1</sup>H NMR Spectrum of Compound 3h**

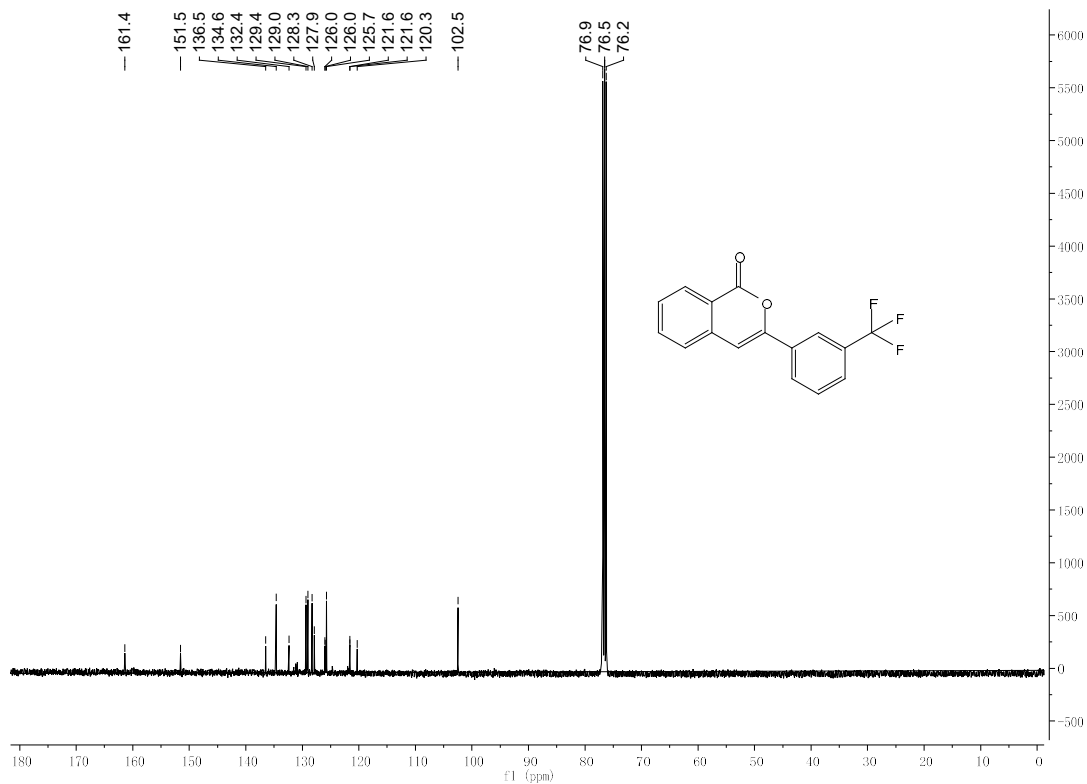

**<sup>13</sup>C NMR Spectrum of Compound 3h**

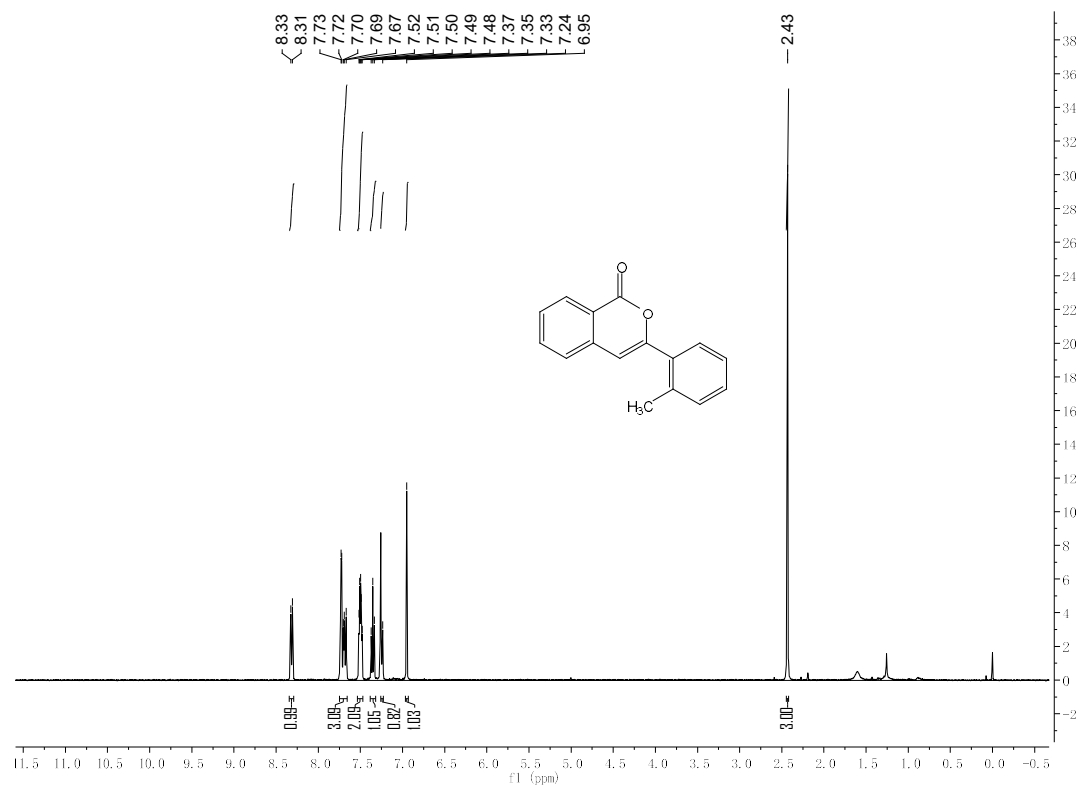

**<sup>1</sup>H NMR Spectrum of Compound 3i**

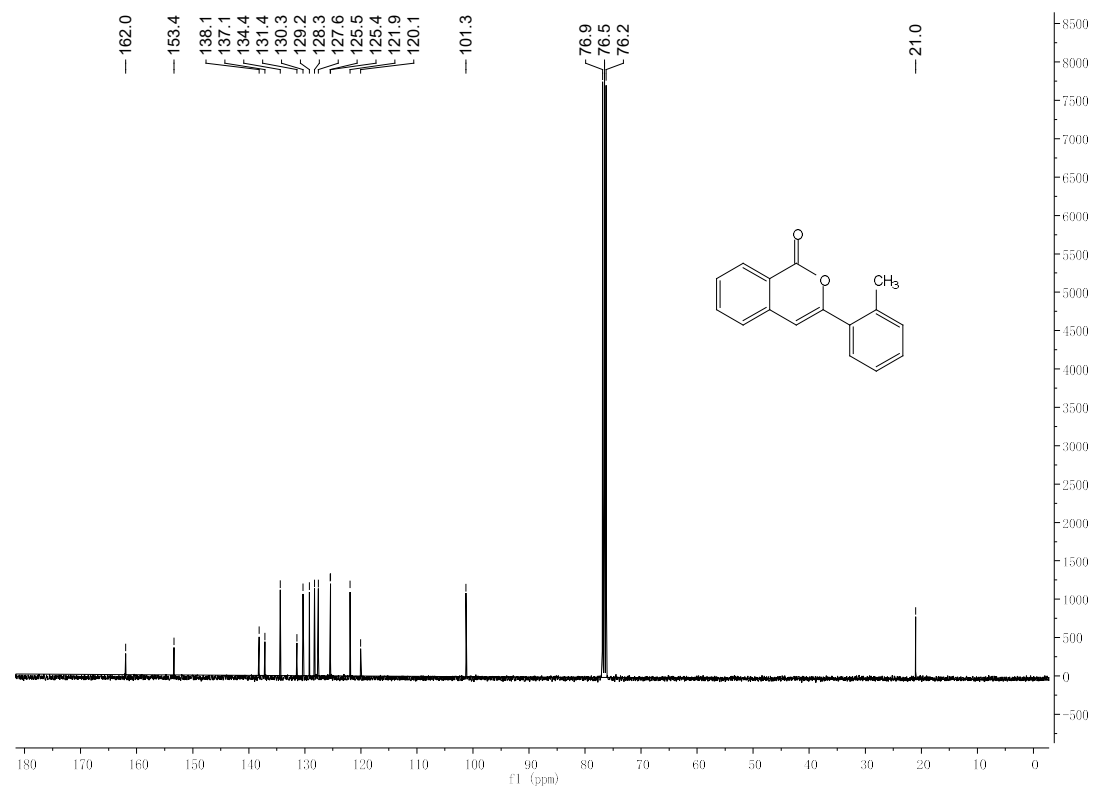

**<sup>13</sup>C NMR Spectrum of Compound 3i**

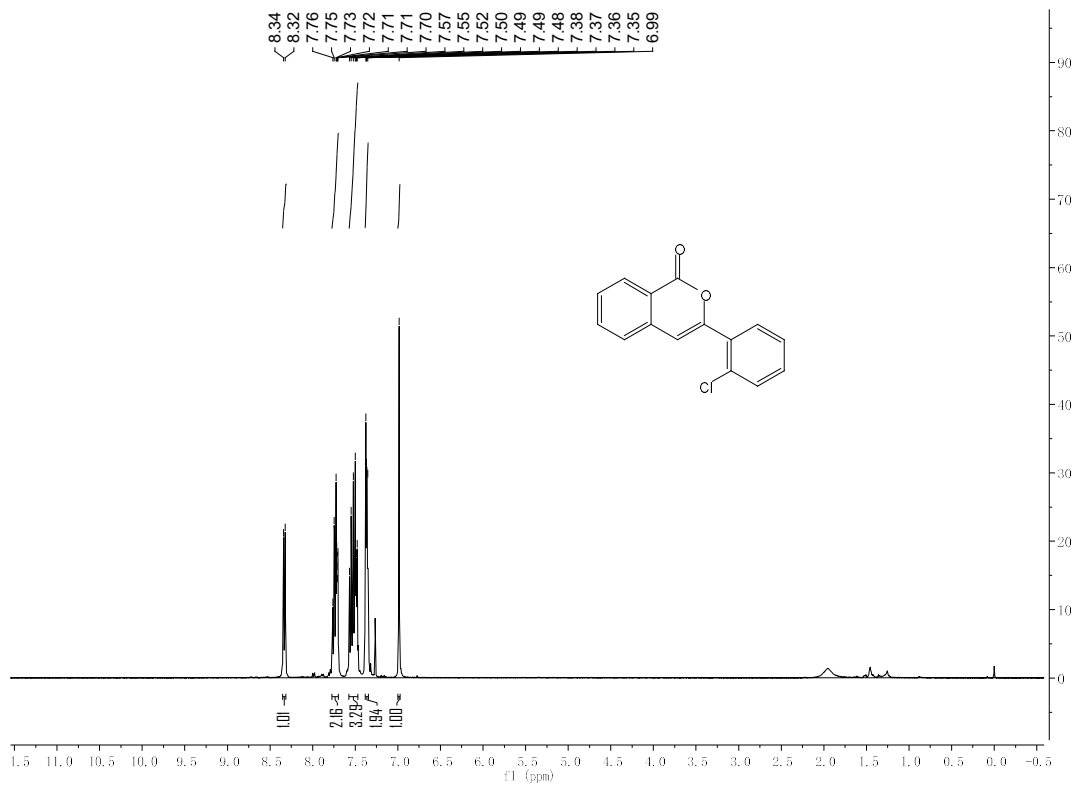

**<sup>1</sup>H NMR Spectrum of Compound 3j**

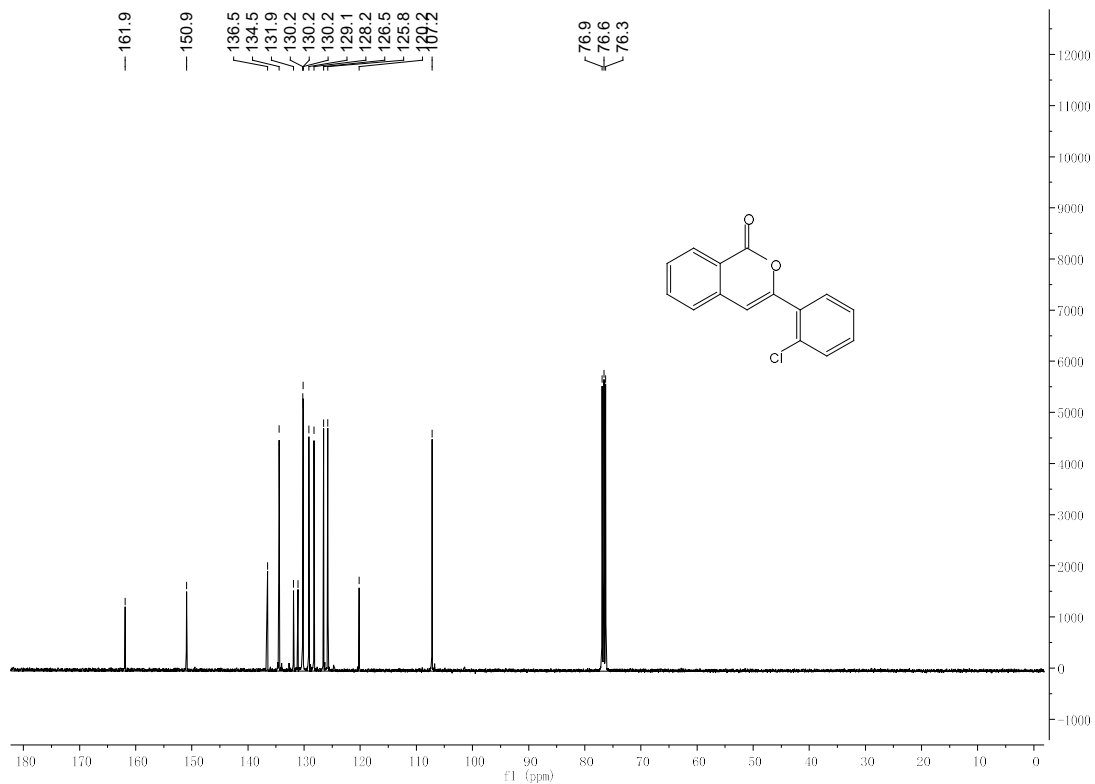

**<sup>13</sup>C NMR Spectrum of Compound 3j**

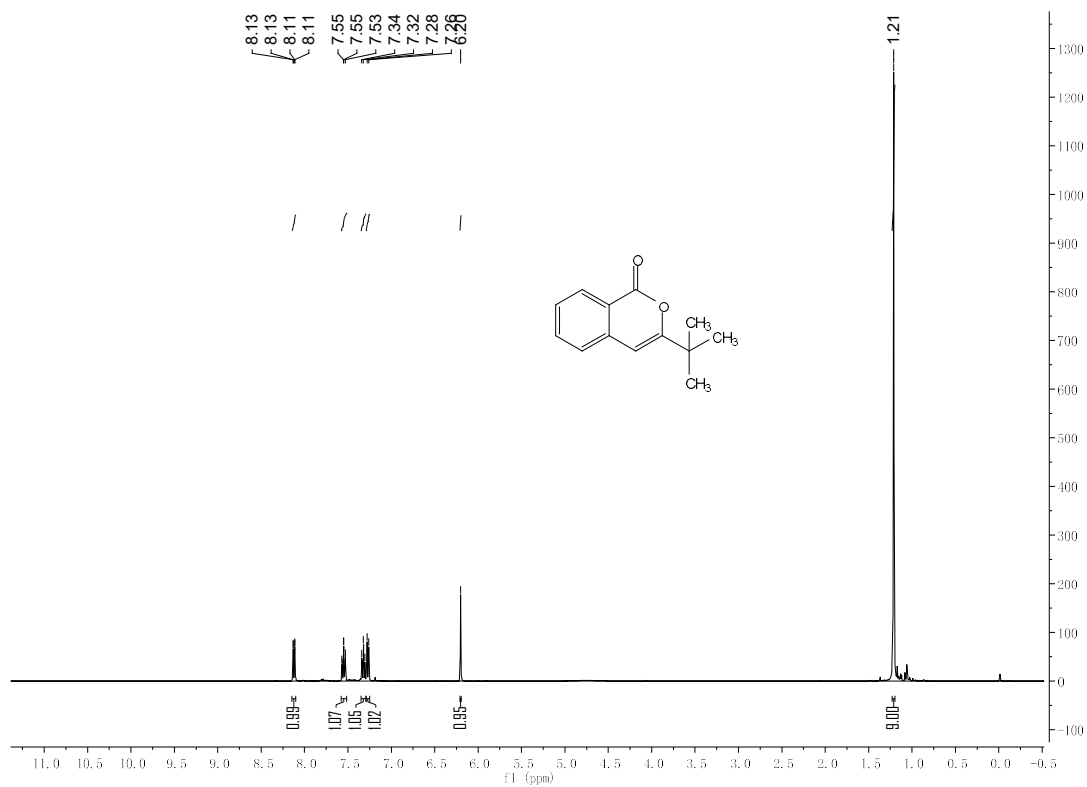

**<sup>1</sup>H NMR Spectrum of Compound 3k**

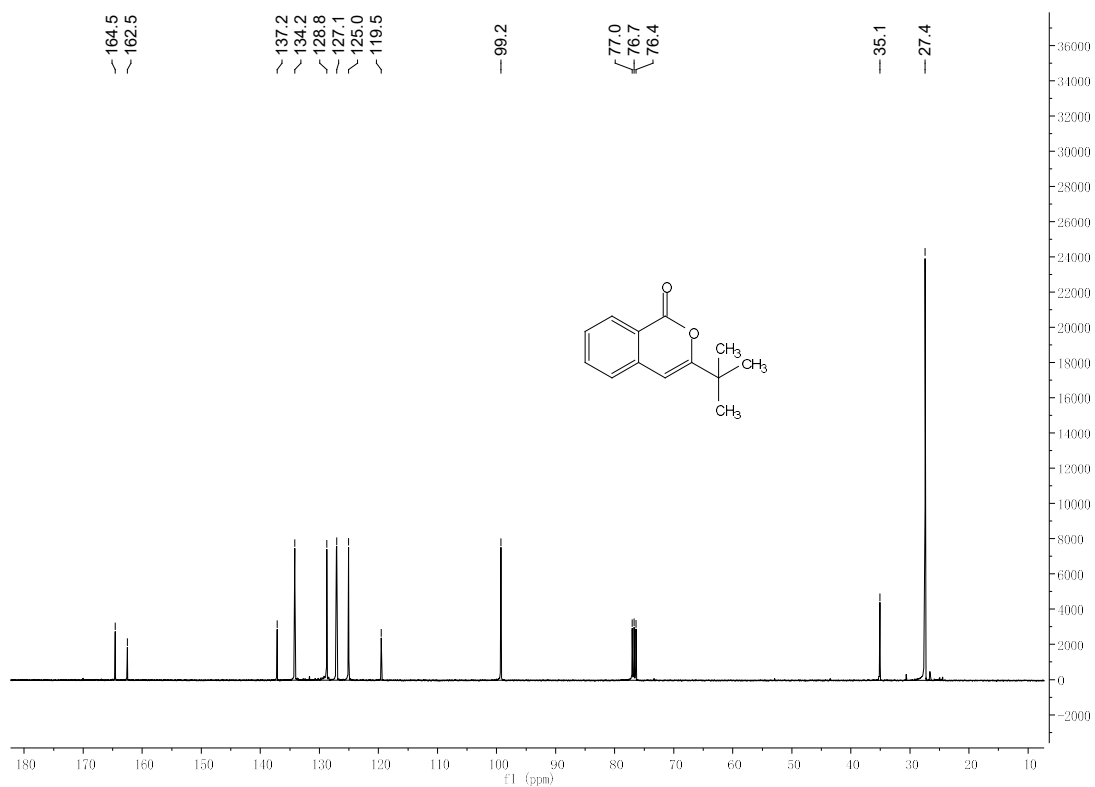

**<sup>13</sup>C NMR Spectrum of Compound 3k**

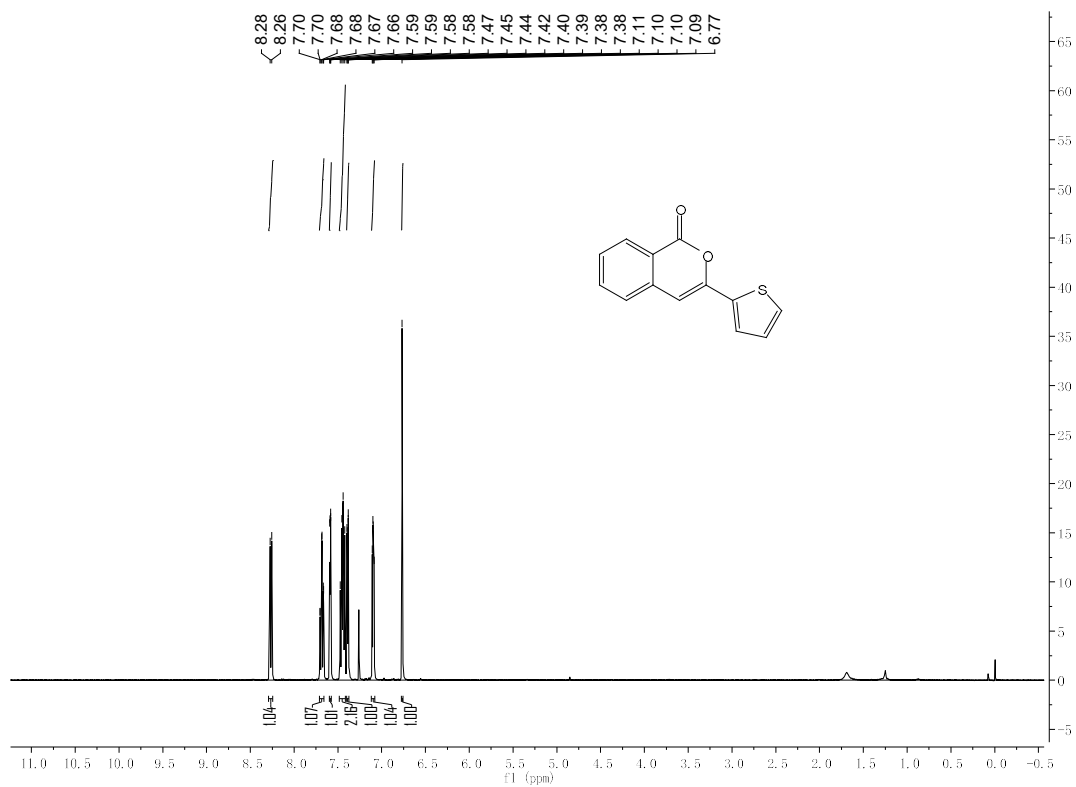

**<sup>1</sup>H NMR Spectrum of Compound 31**

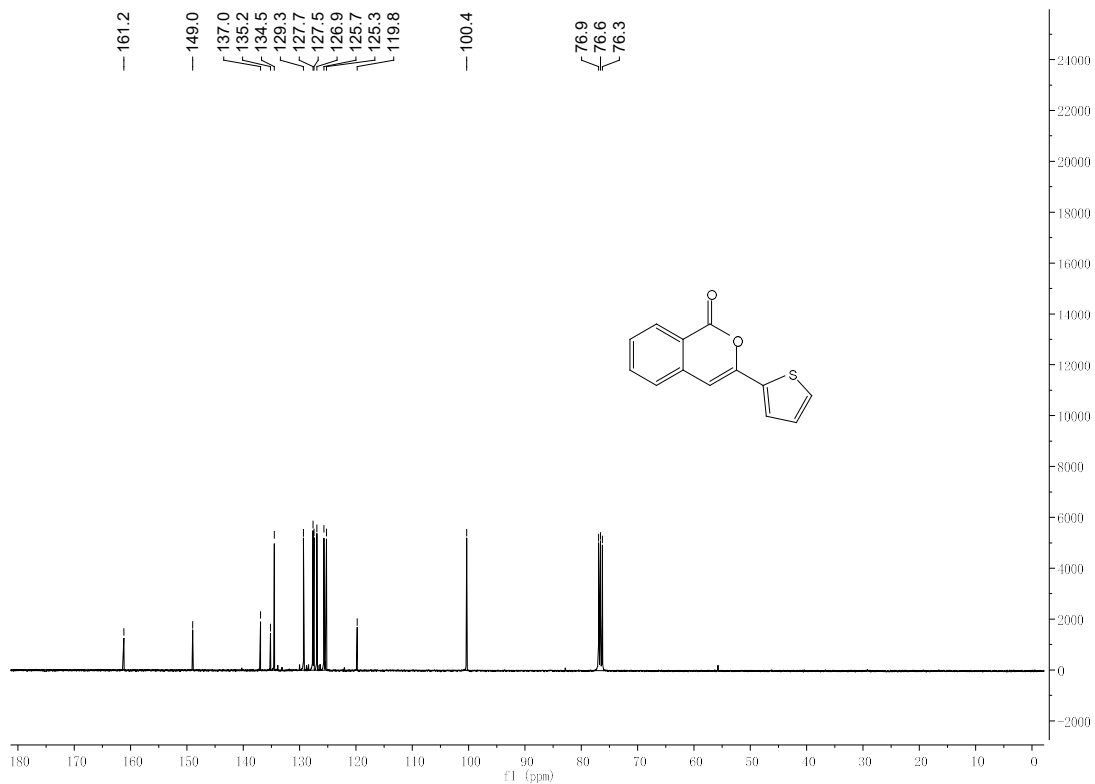

**<sup>13</sup>C NMR Spectrum of Compound 31**

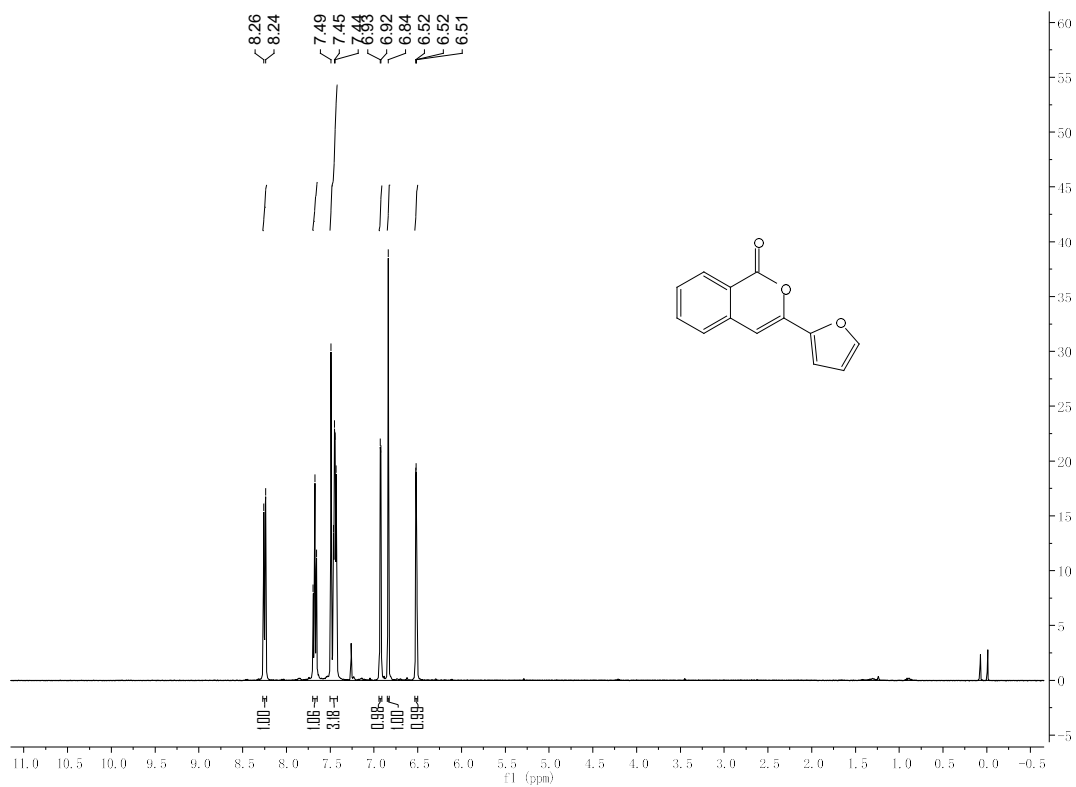

**<sup>1</sup>H NMR Spectrum of Compound 3m**

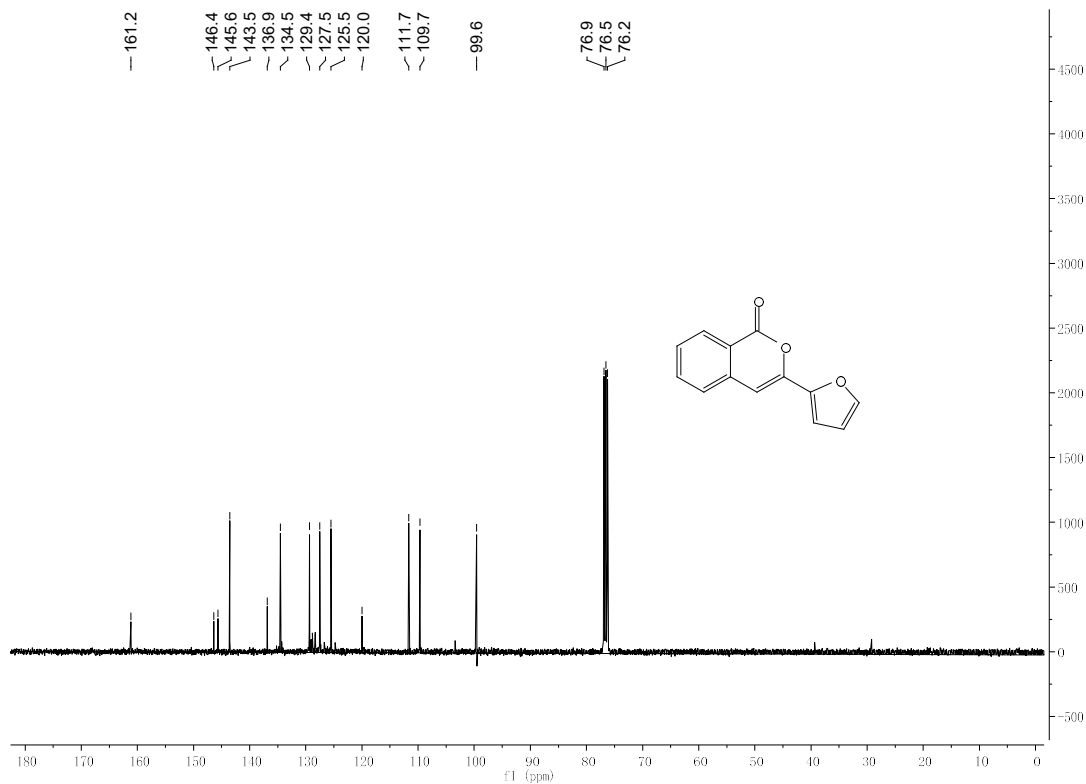

**<sup>13</sup>C NMR Spectrum of Compound 3m**

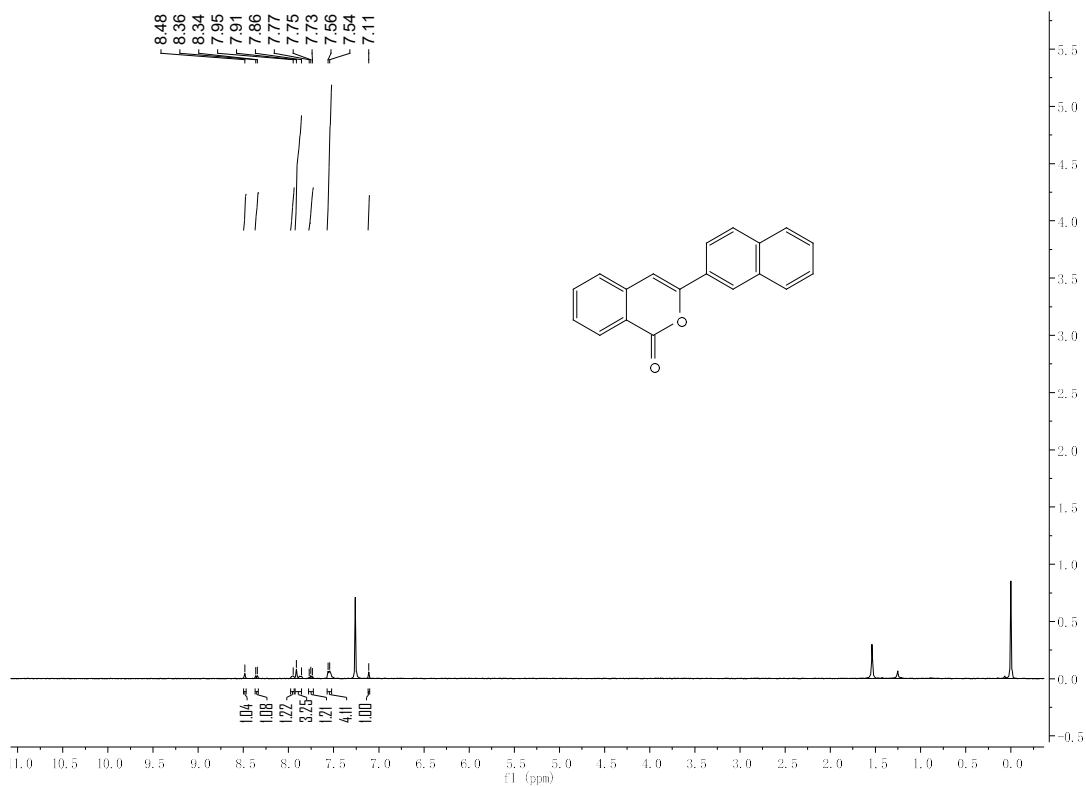

**<sup>1</sup>H NMR Spectrum of Compound 3n**

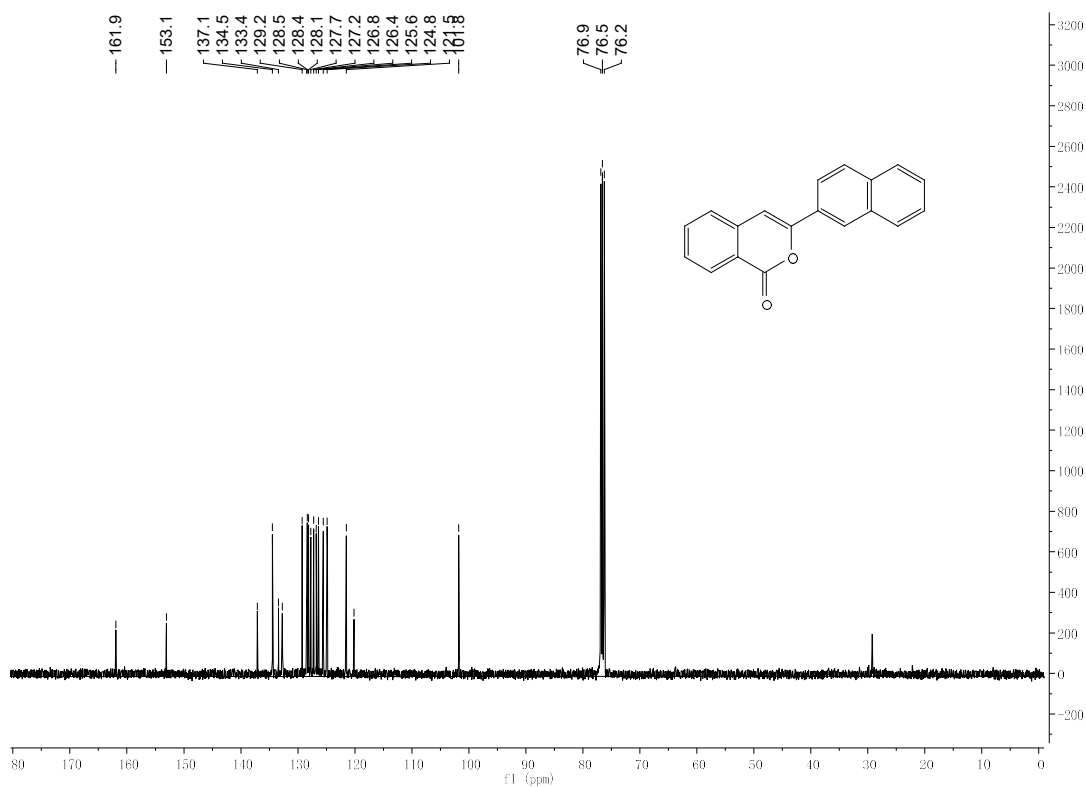

**<sup>13</sup>C NMR Spectrum of Compound 3n**

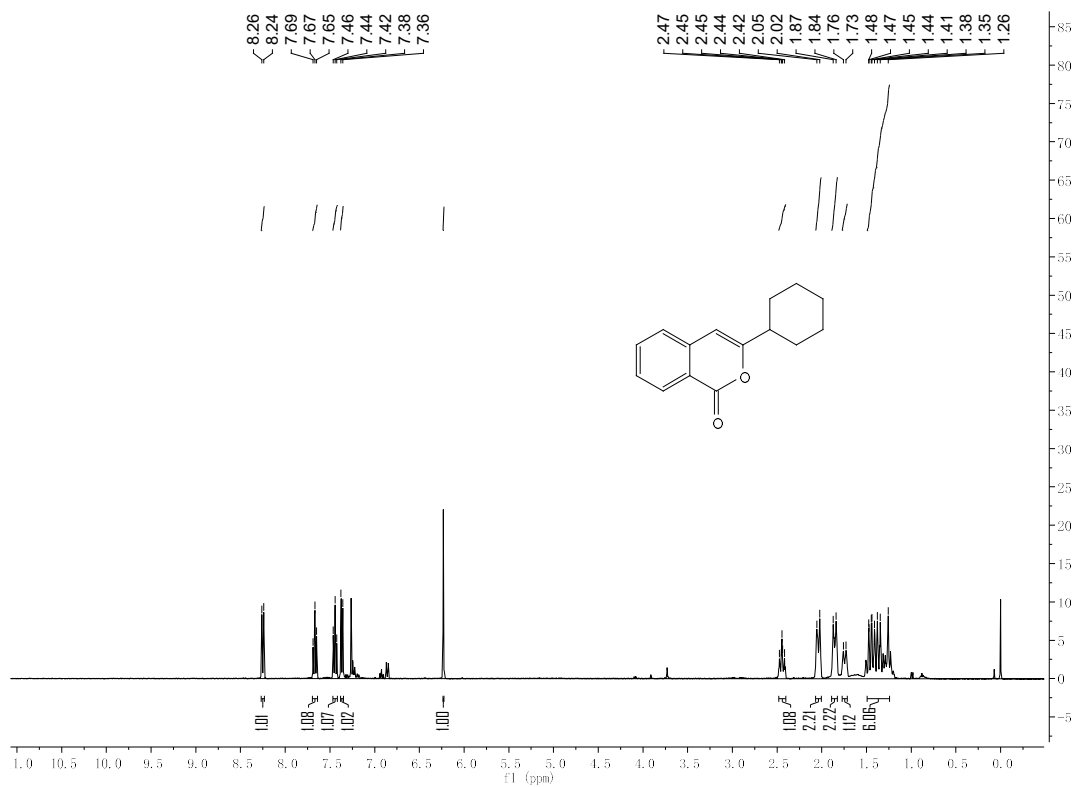

**<sup>1</sup>H NMR Spectrum of Compound 30**

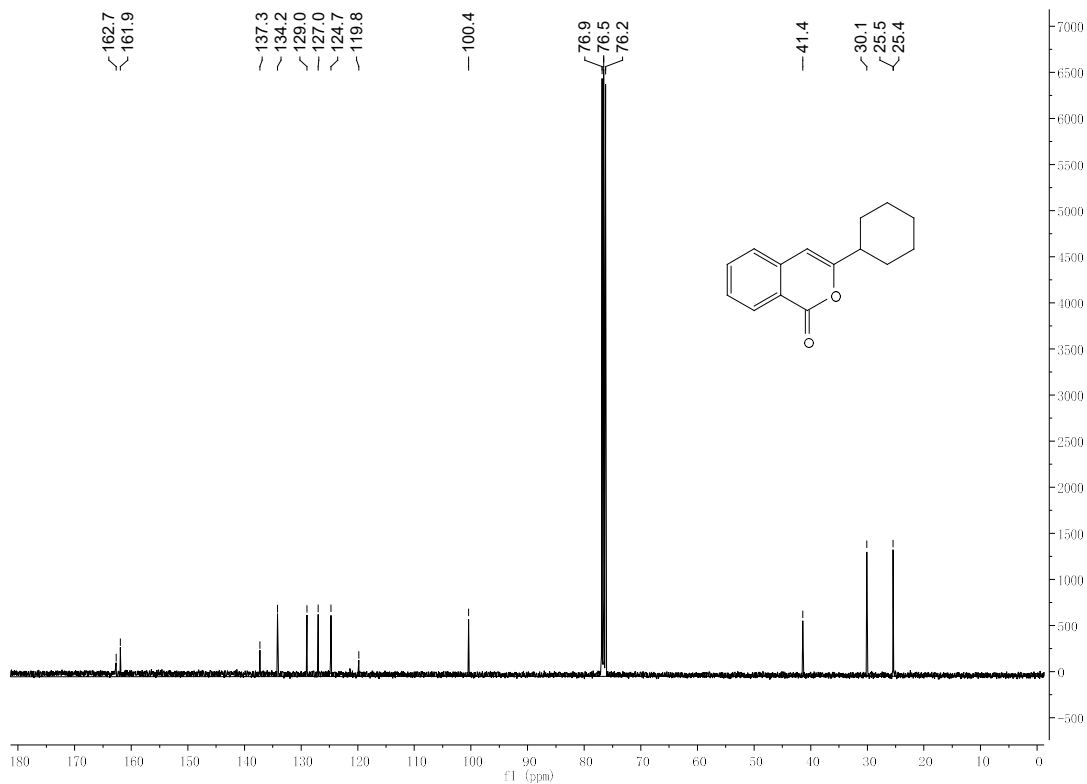

**<sup>13</sup>C NMR Spectrum of Compound 30**



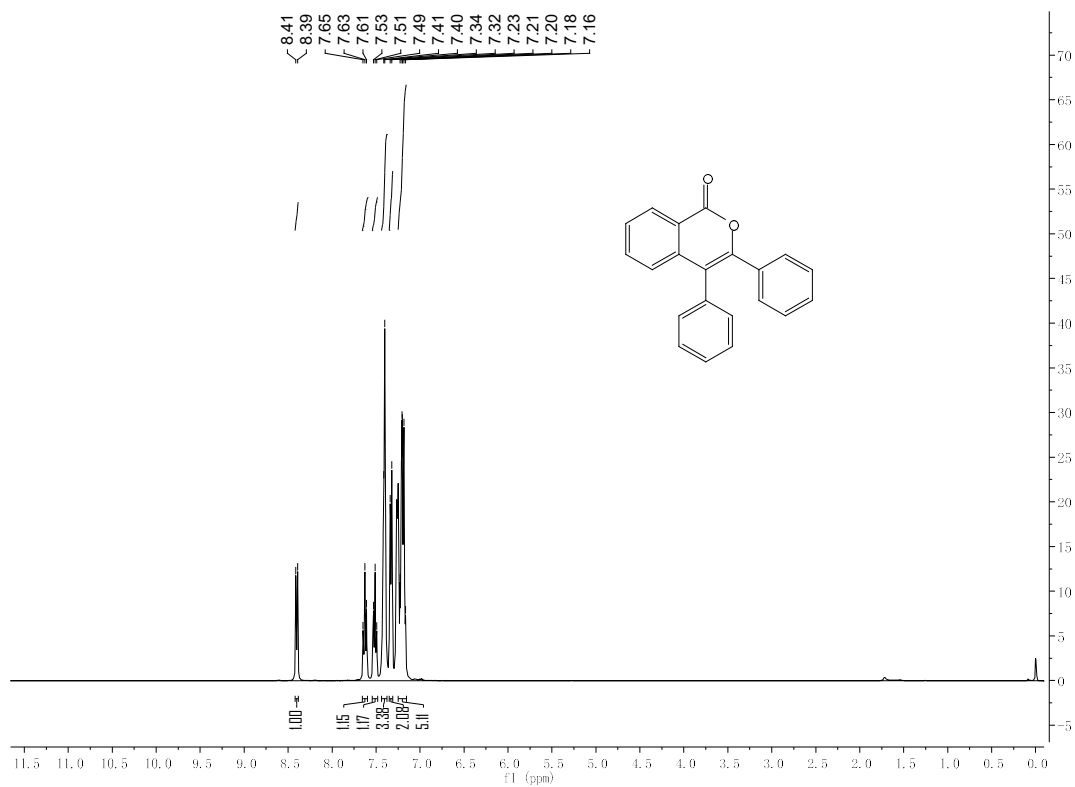

**<sup>1</sup>H NMR Spectrum of Compound 3p**

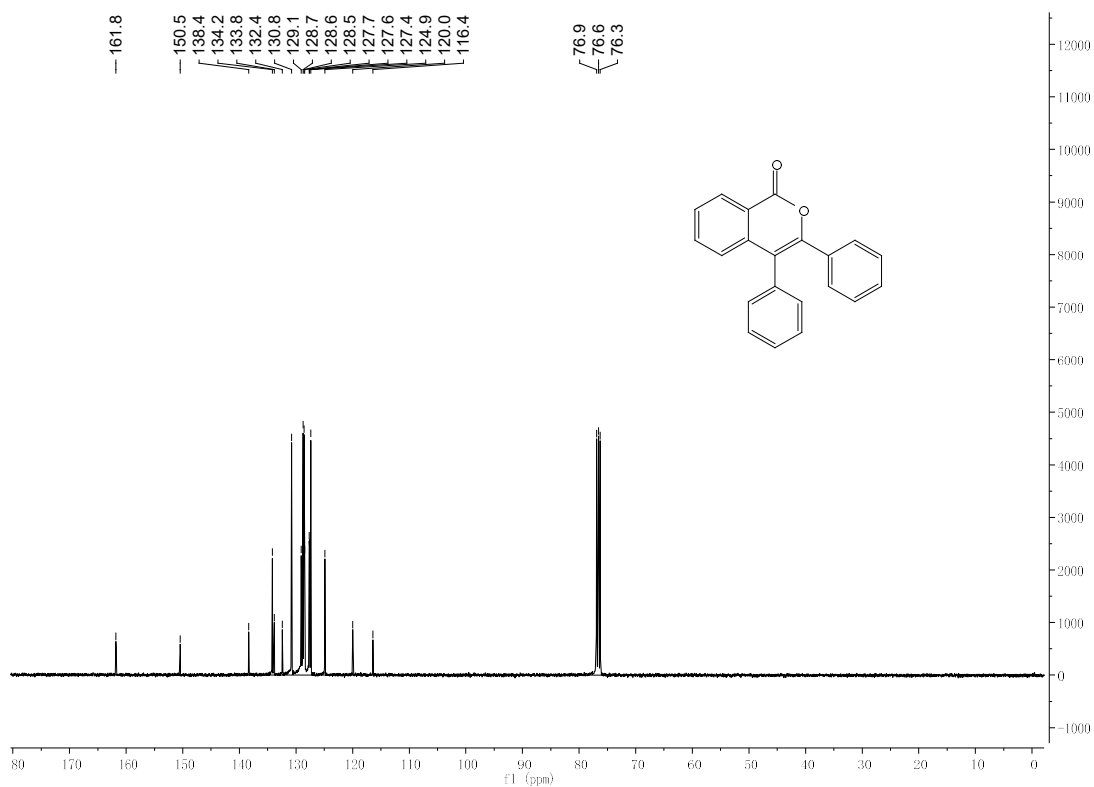

**<sup>13</sup>C NMR Spectrum of Compound 3p**

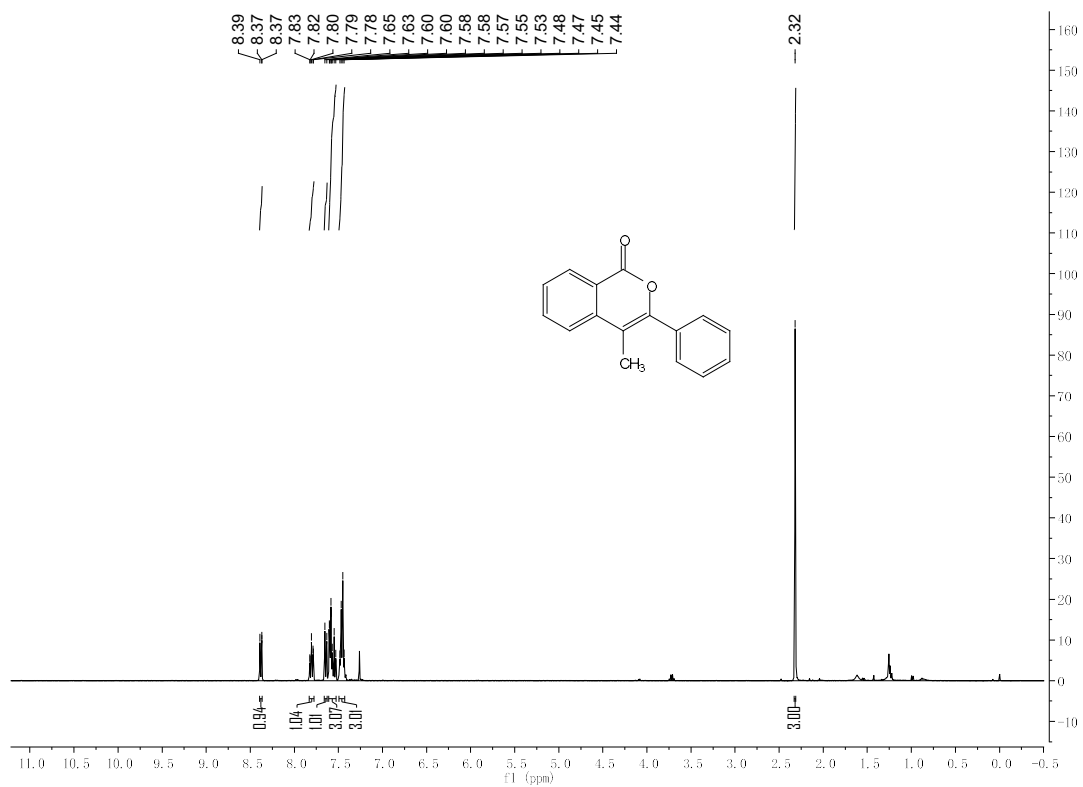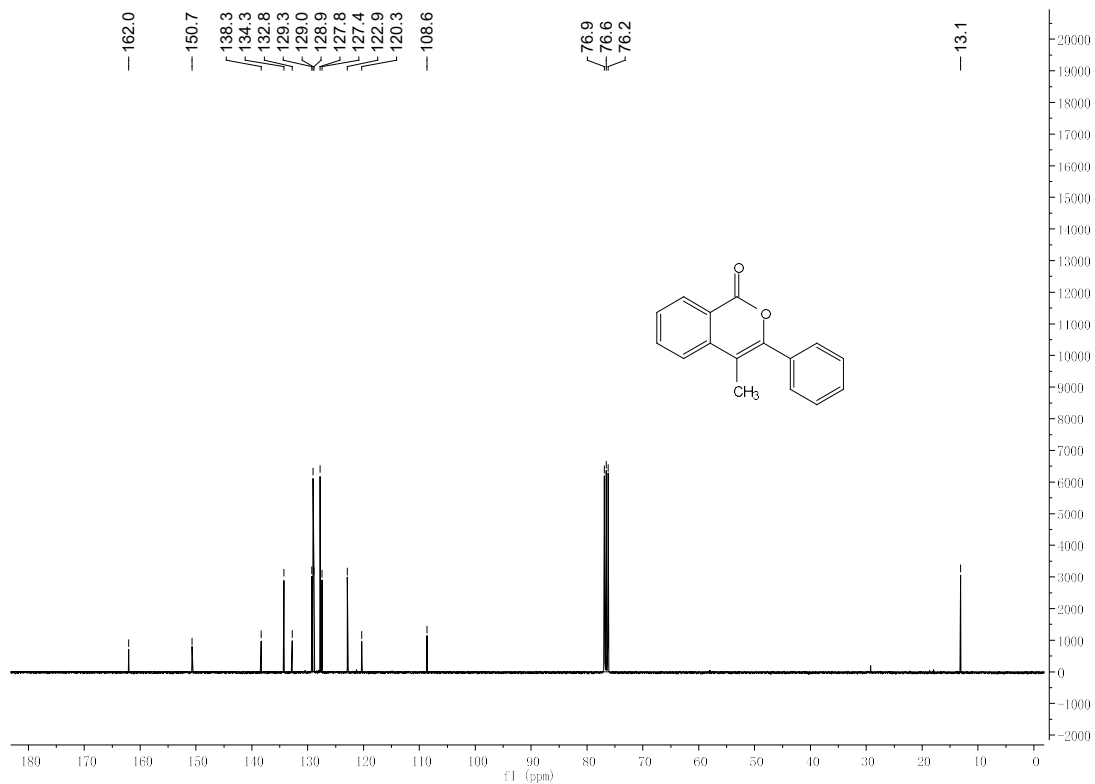

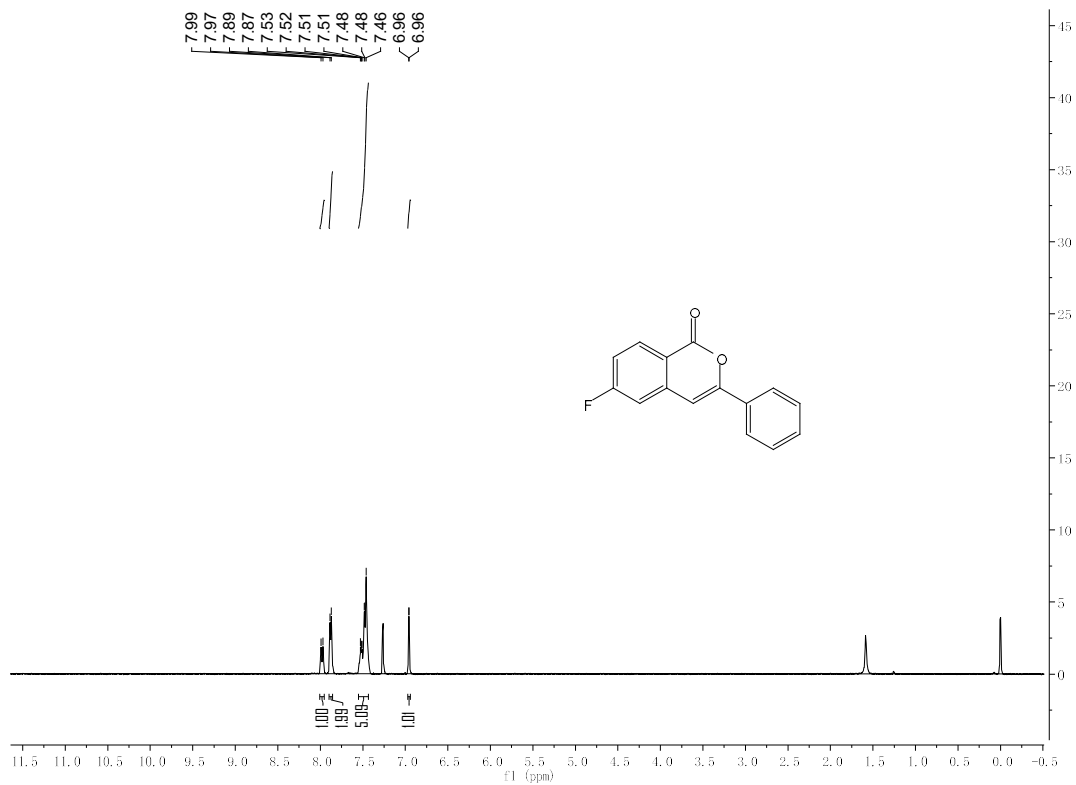

**<sup>1</sup>H NMR Spectrum of Compound 3r**

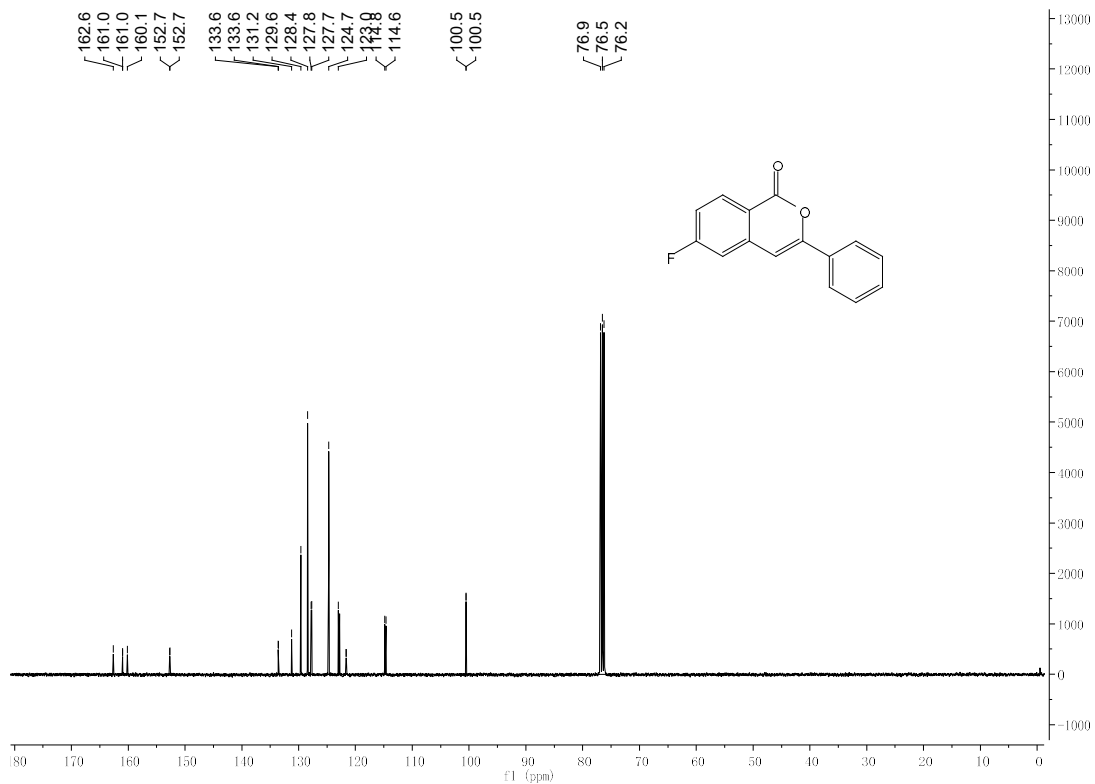

**<sup>13</sup>C NMR Spectrum of Compound 3r**

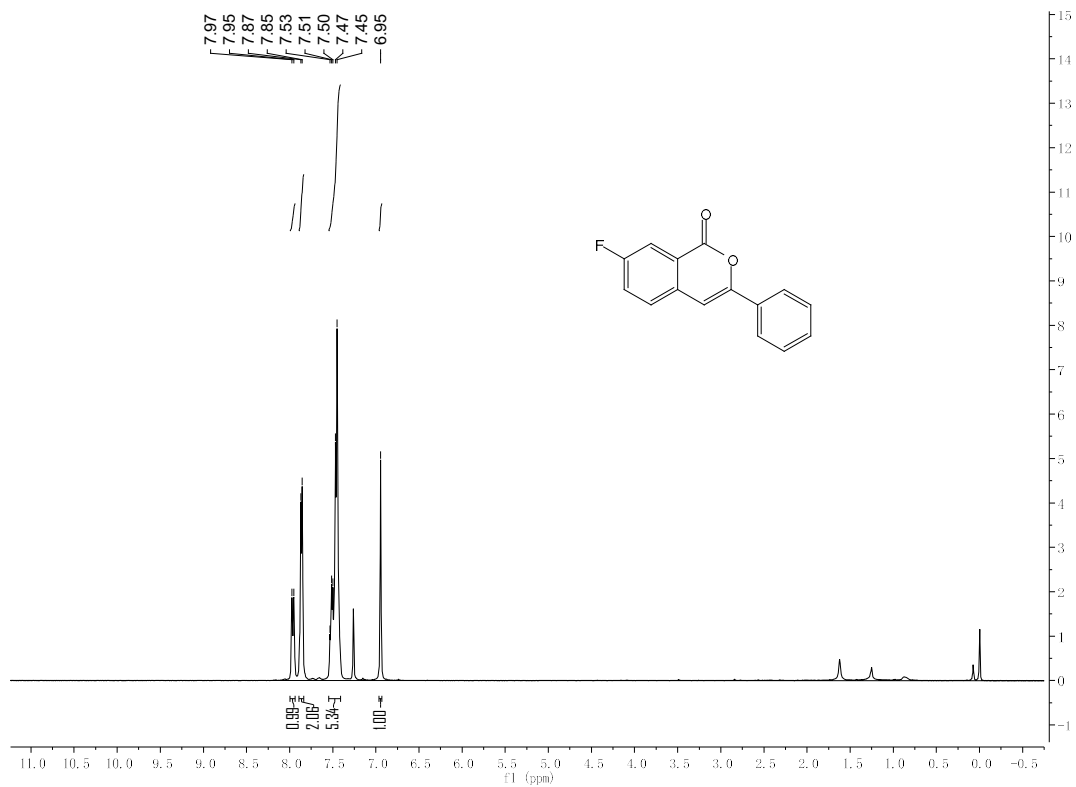

**<sup>1</sup>H NMR Spectrum of Compound 3s**

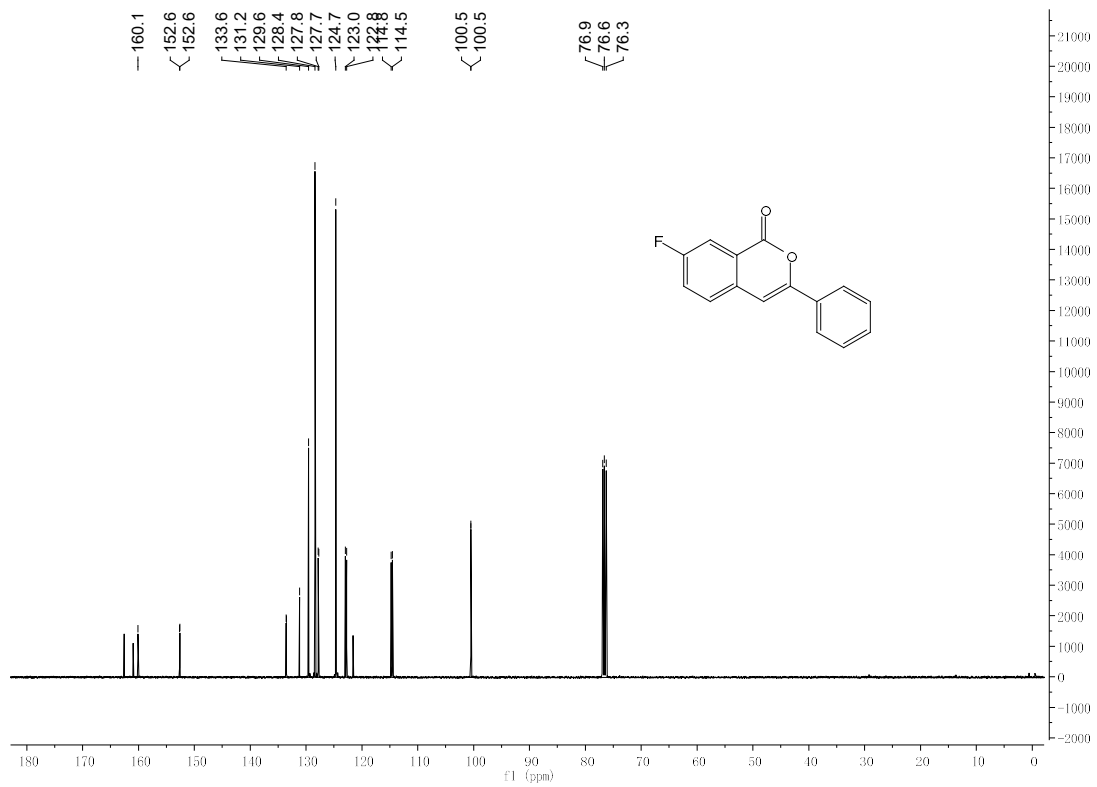

**<sup>13</sup>C NMR Spectrum of Compound 3s**

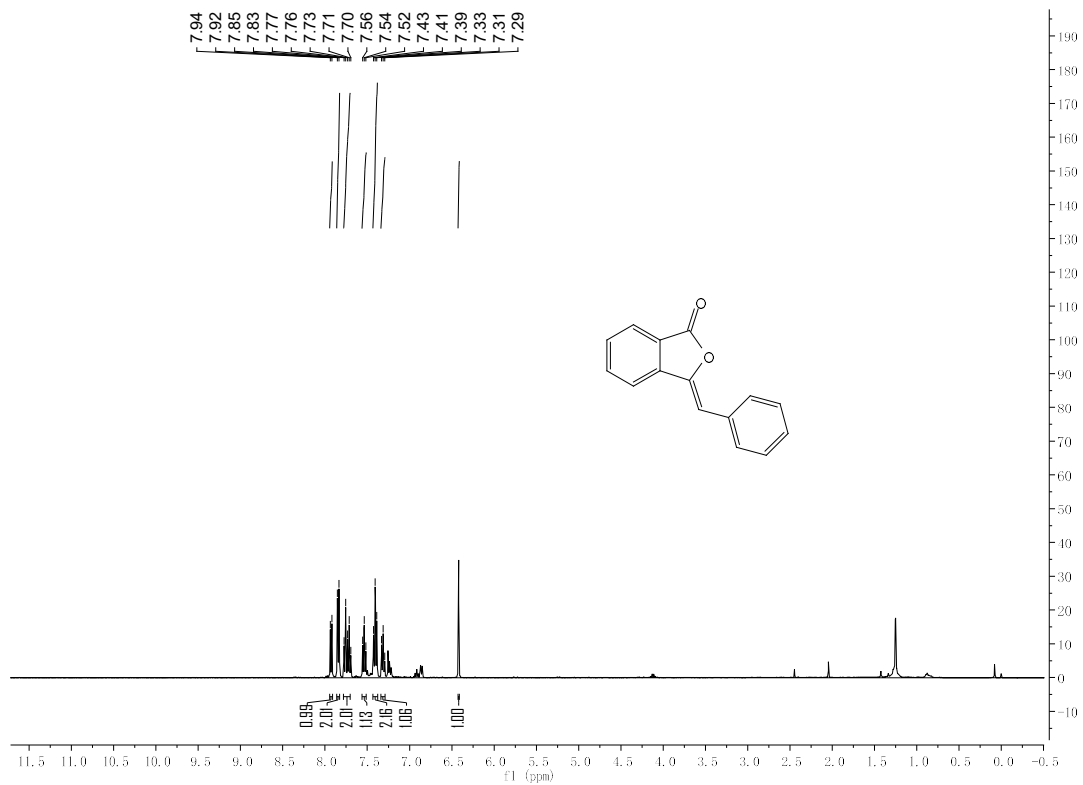

**<sup>1</sup>H NMR Spectrum of Compound 5a**

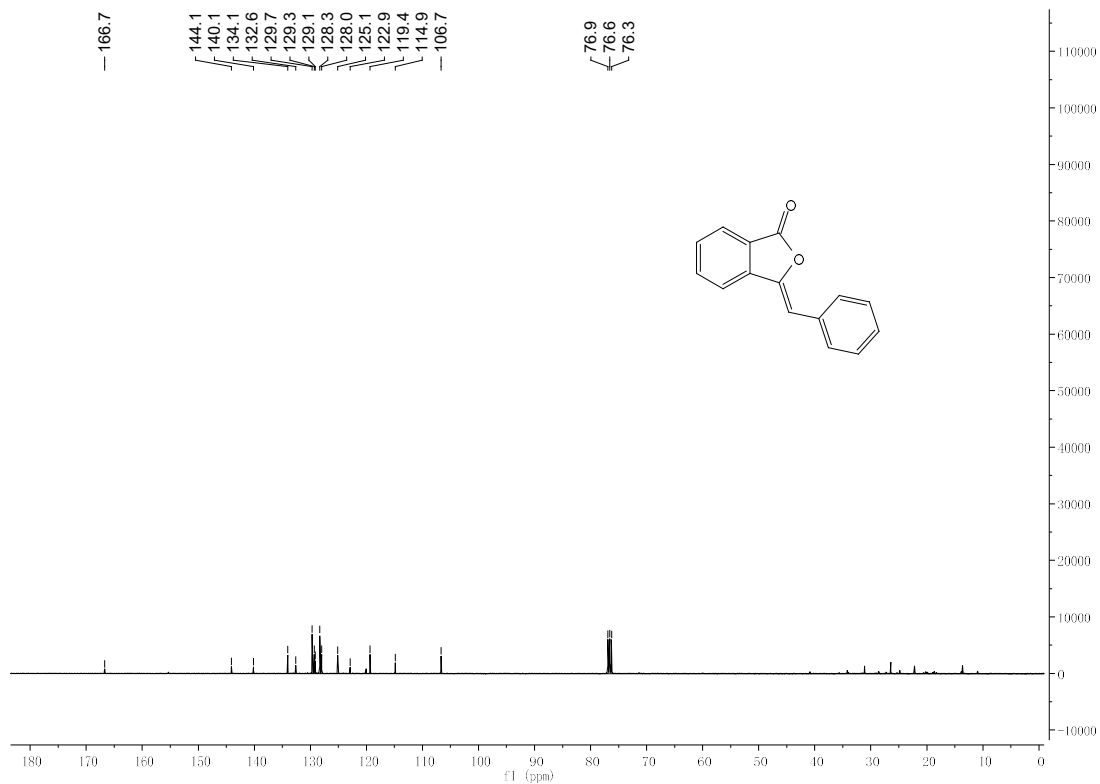

**<sup>13</sup>C NMR Spectrum of Compound 5a**

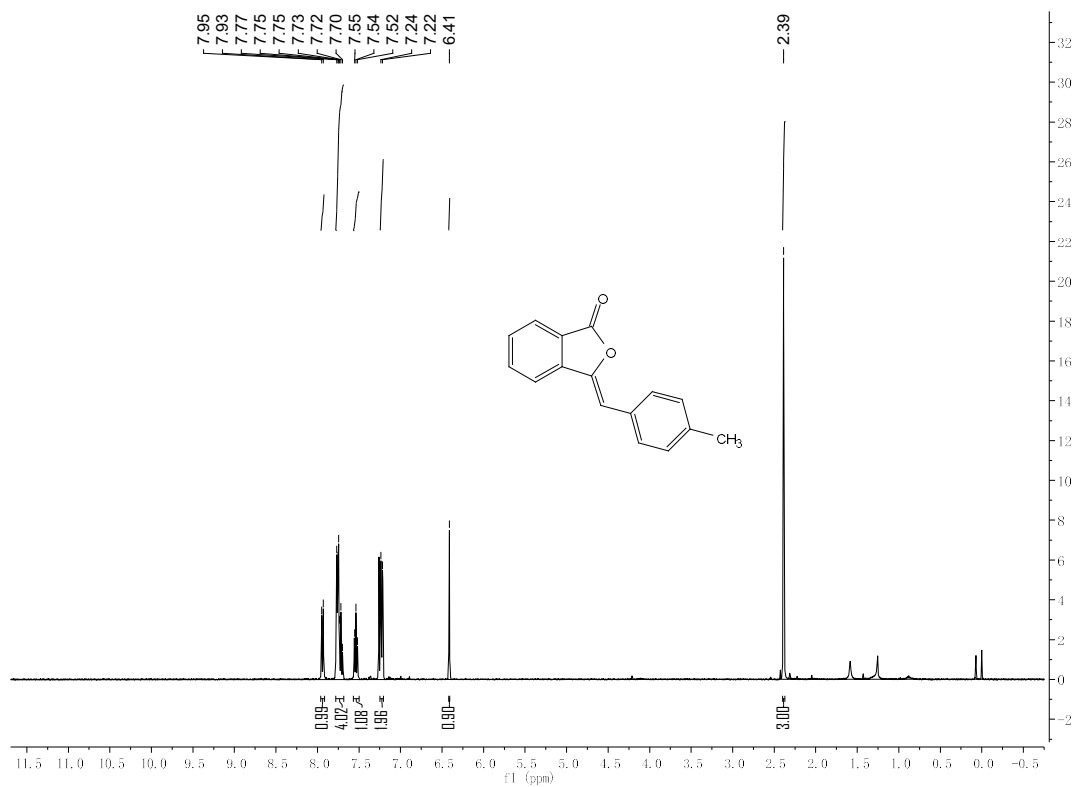

**<sup>1</sup>H NMR Spectrum of Compound 5b**

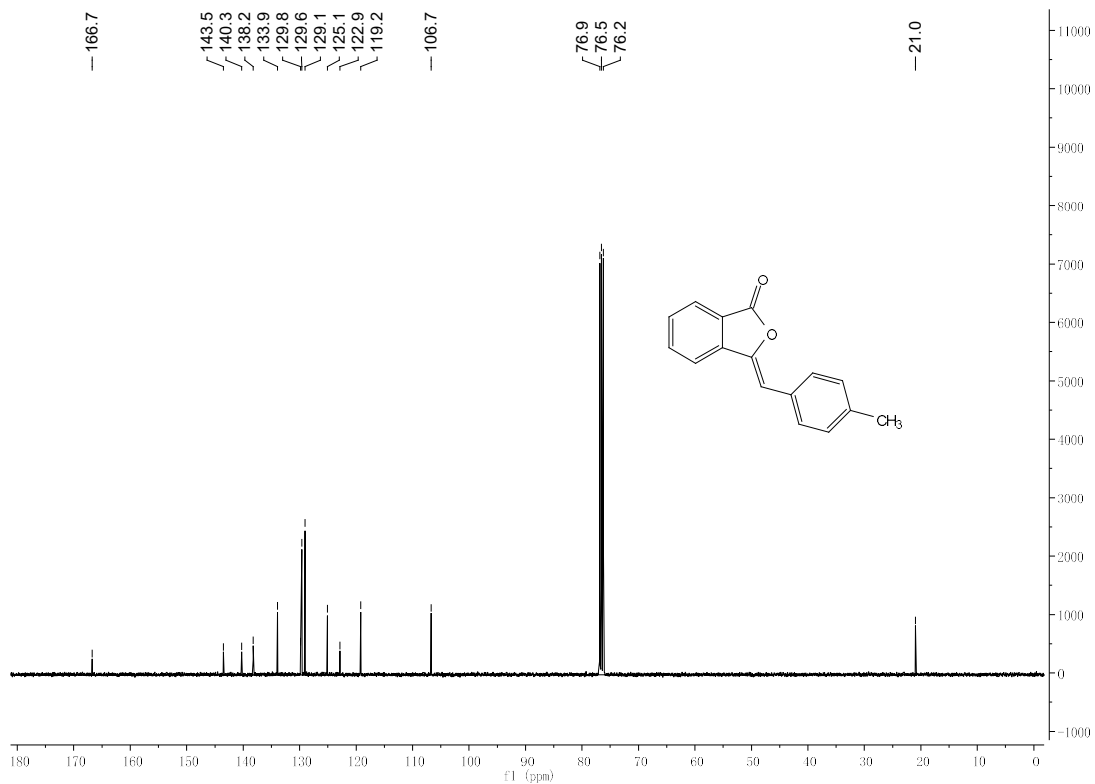

**<sup>13</sup>C NMR Spectrum of Compound 5b**

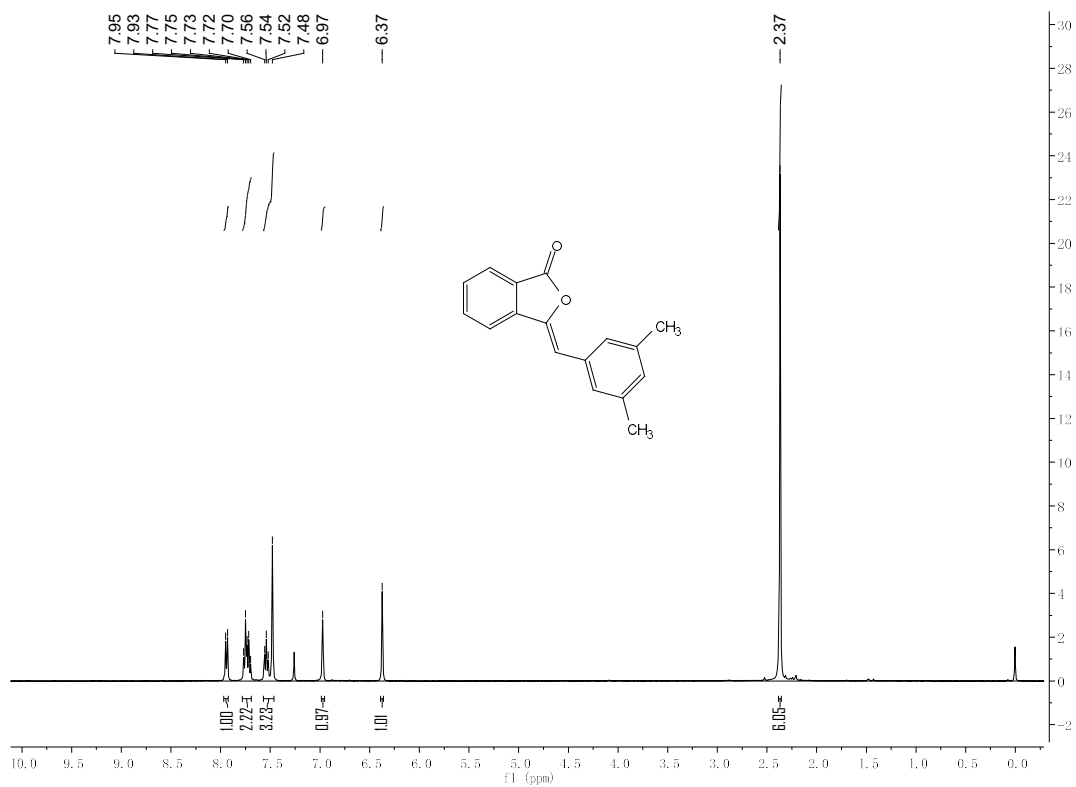

**<sup>1</sup>H NMR Spectrum of Compound 5c**

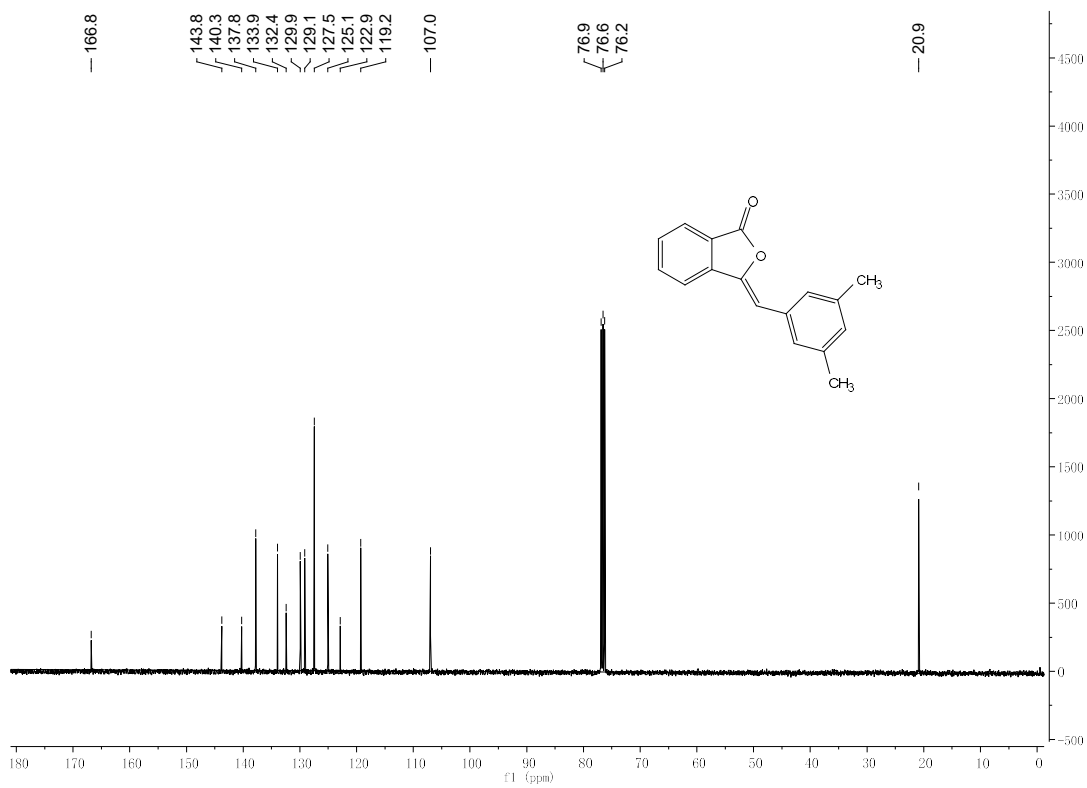

**<sup>13</sup>C NMR Spectrum of Compound 5c**

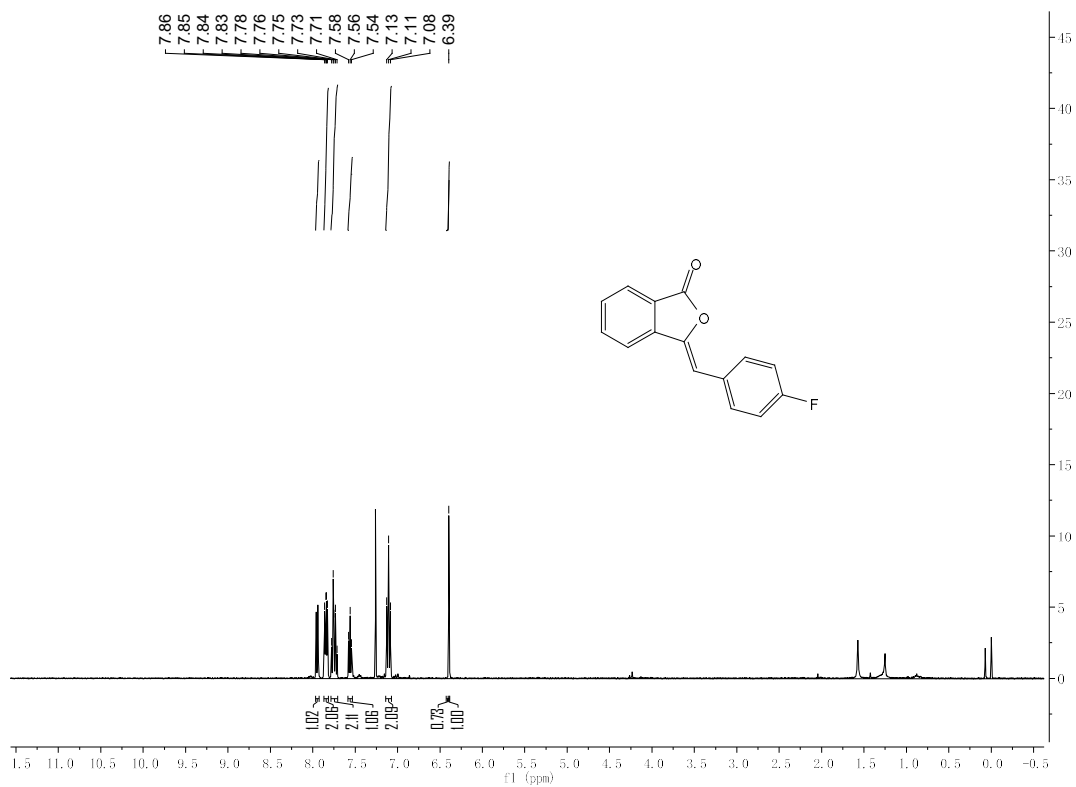

<sup>1</sup>H NMR Spectrum of Compound 5d

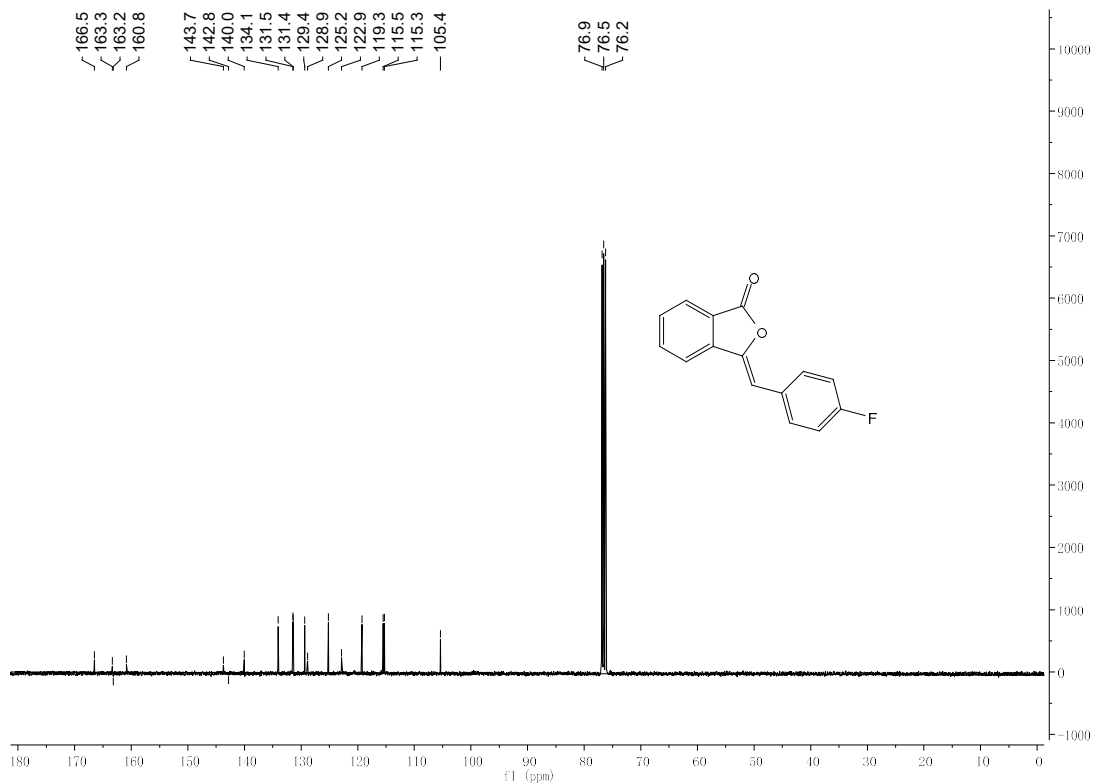

<sup>13</sup>C NMR Spectrum of Compound 5d



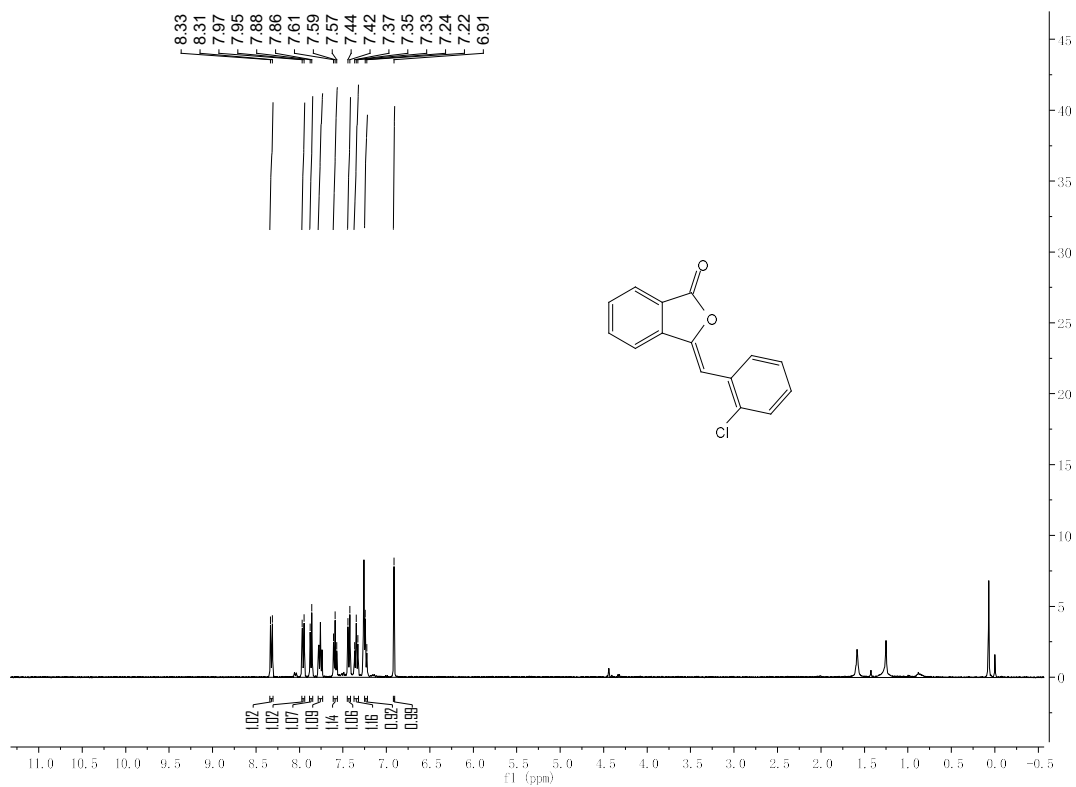

**<sup>1</sup>H NMR Spectrum of Compound 5e**

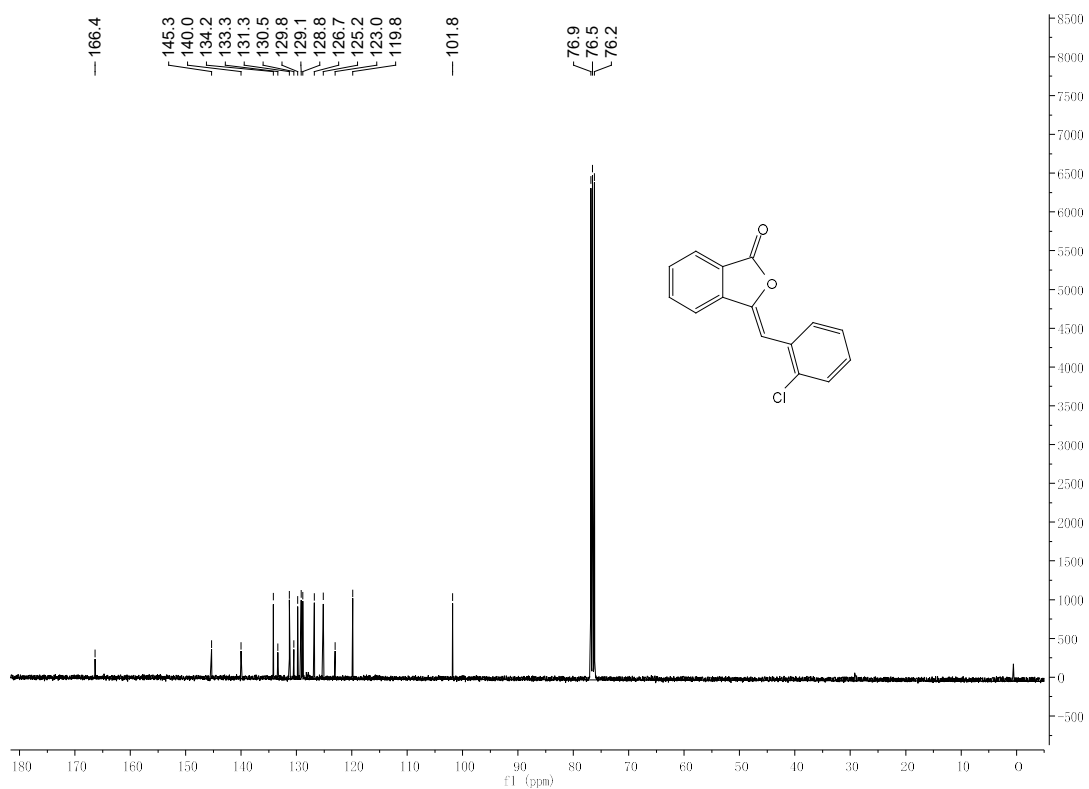

**<sup>13</sup>C NMR Spectrum of Compound 5e**

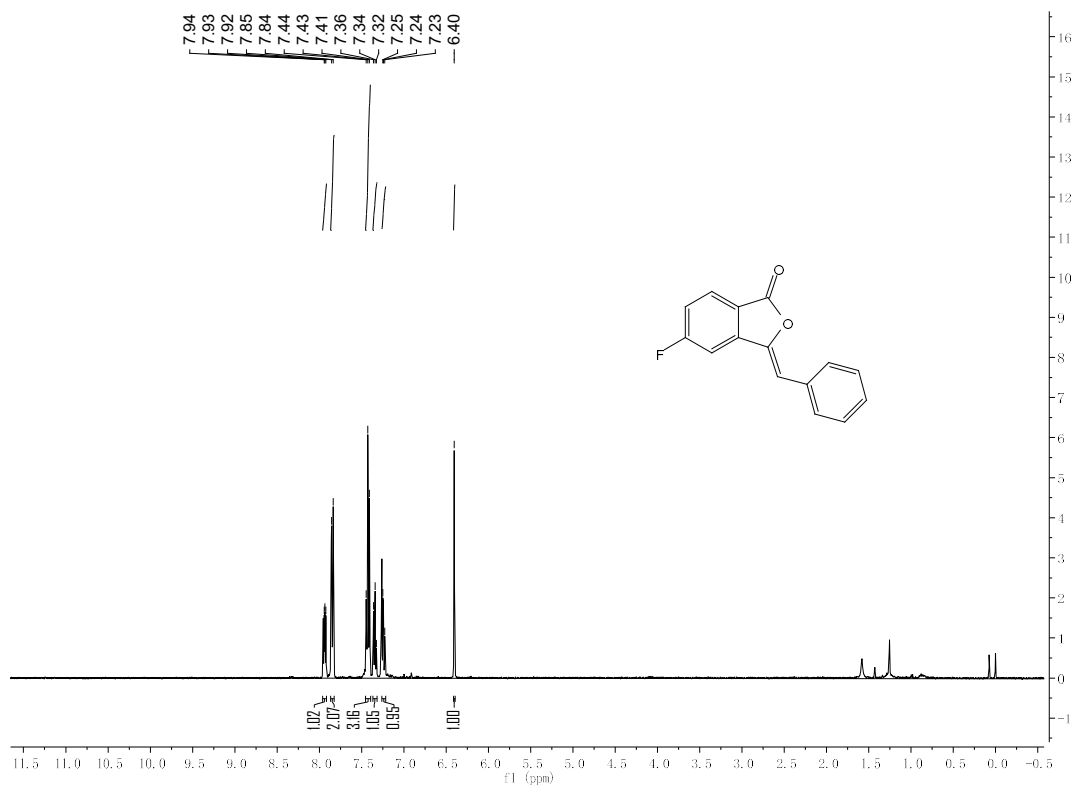

**<sup>1</sup>H NMR Spectrum of Compound 5f**

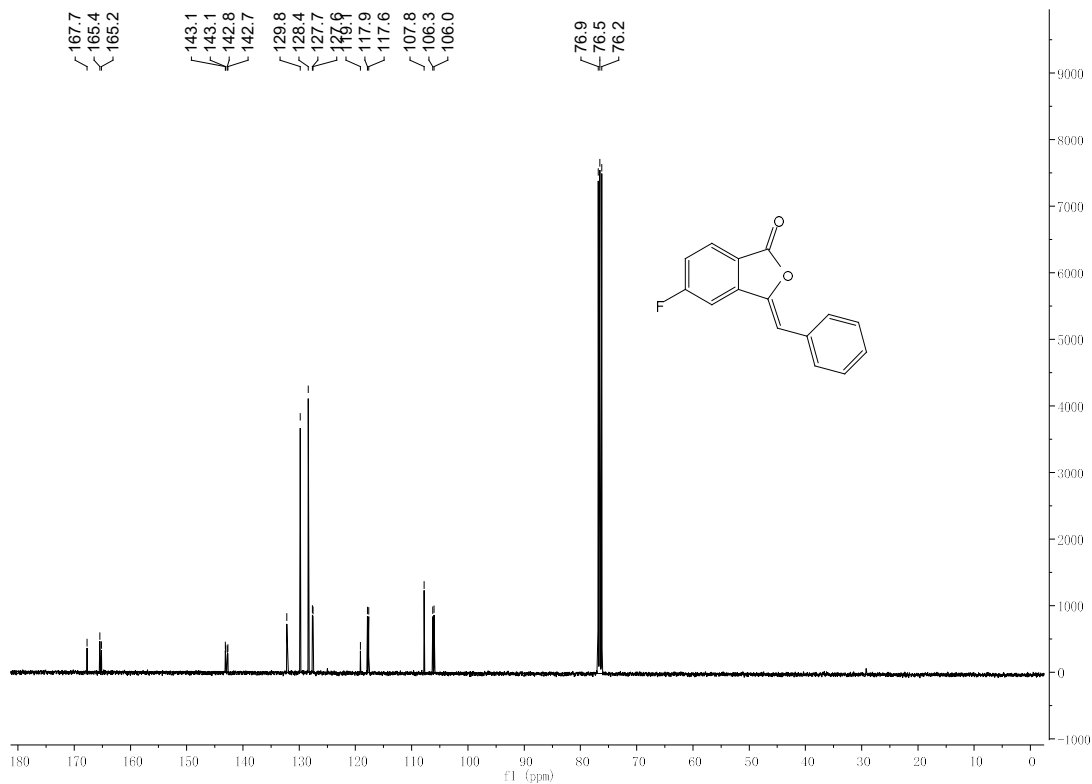

**<sup>13</sup>C NMR Spectrum of Compound 5f**

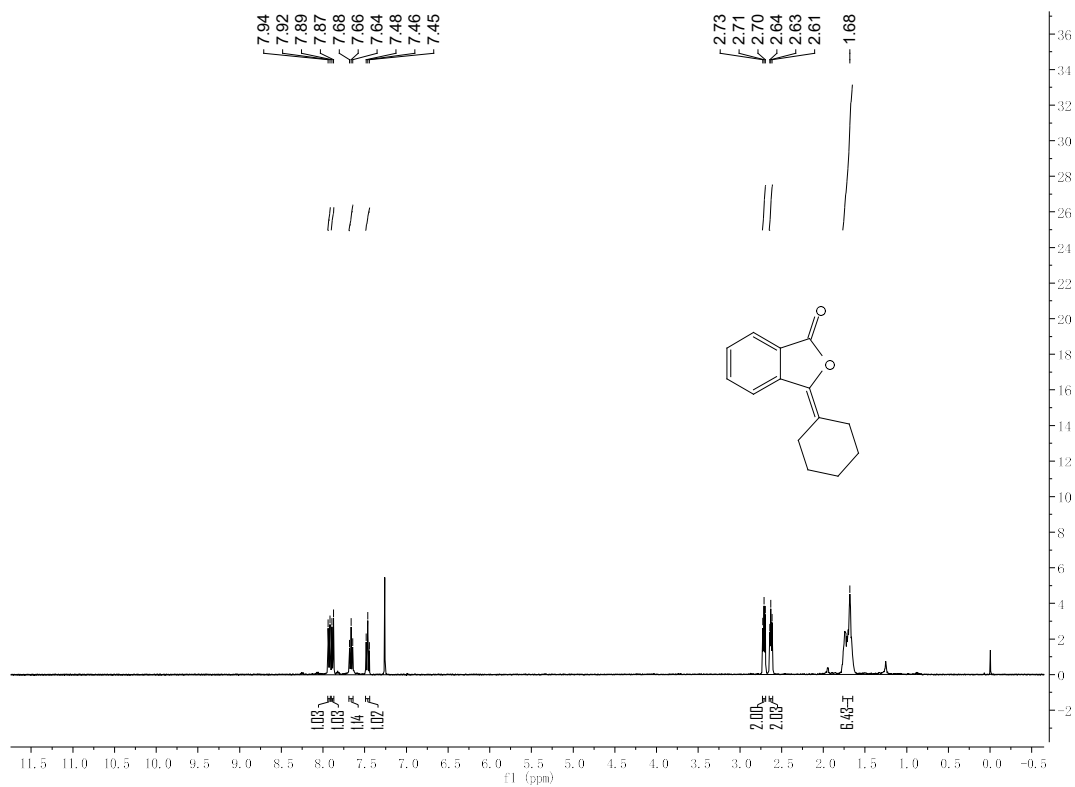

**<sup>1</sup>H NMR Spectrum of Compound 5g**

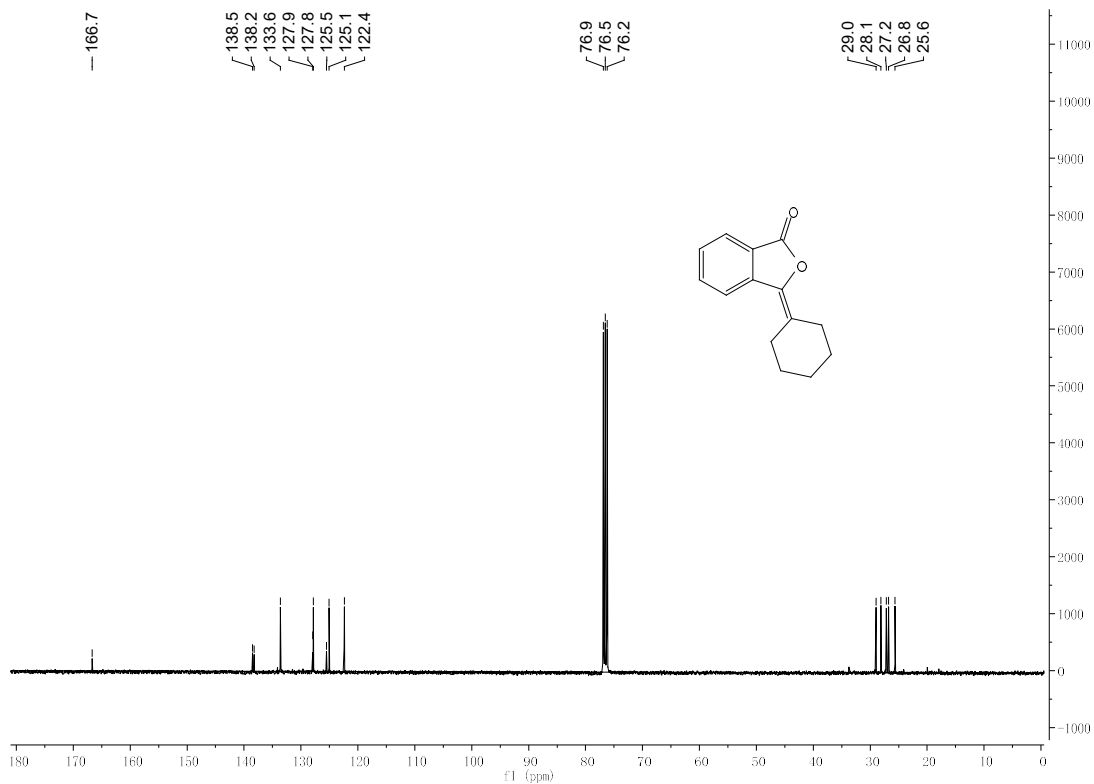

**<sup>13</sup>C NMR Spectrum of Compound 5g**

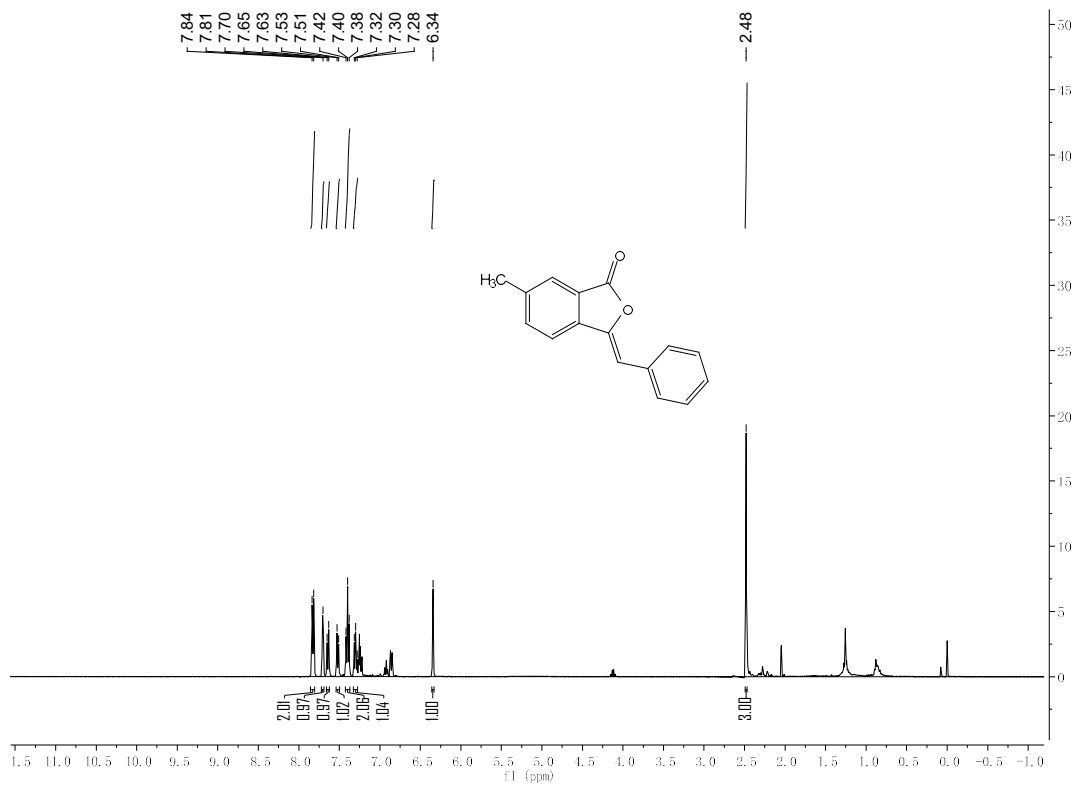

**<sup>1</sup>H NMR Spectrum of Compound 5h**

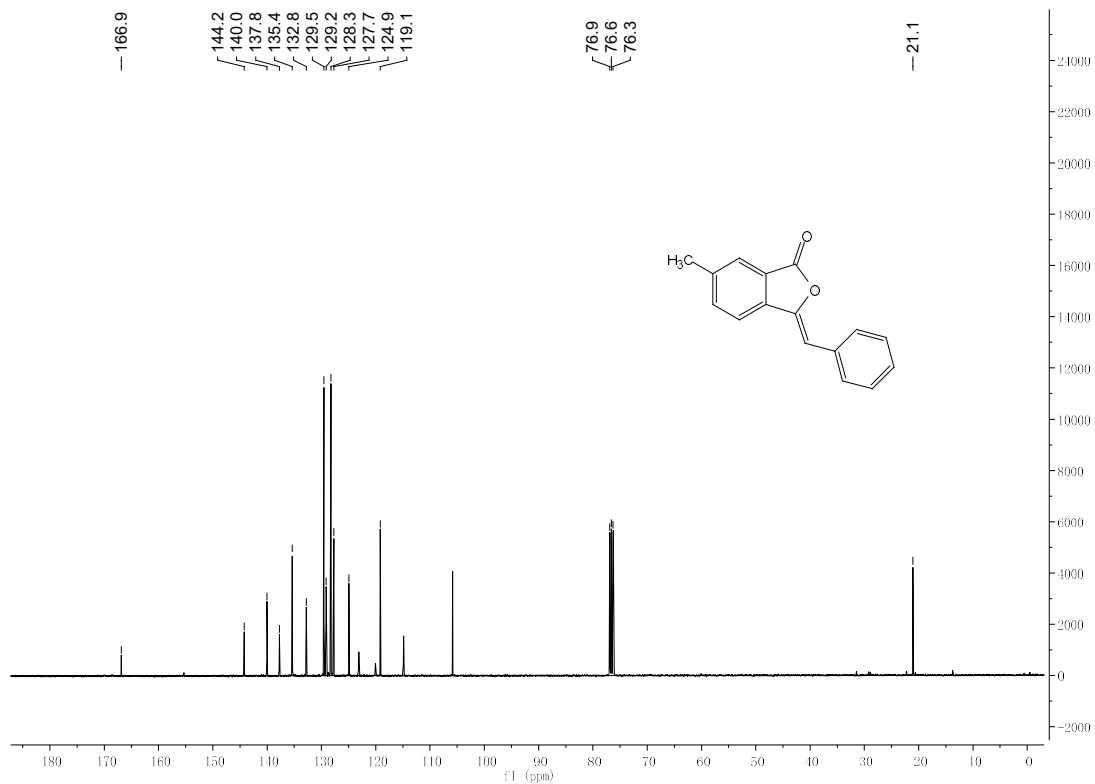

**<sup>13</sup>C NMR Spectrum of Compound 5h**

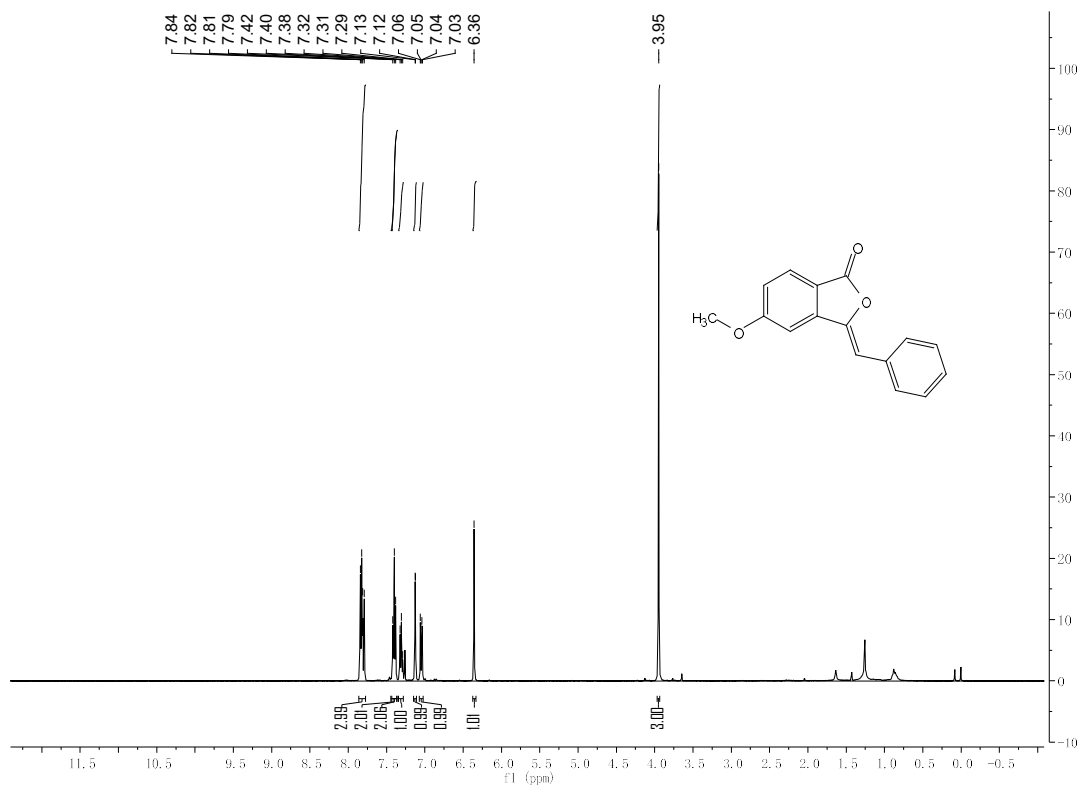

**<sup>1</sup>H NMR Spectrum of Compound 5i**

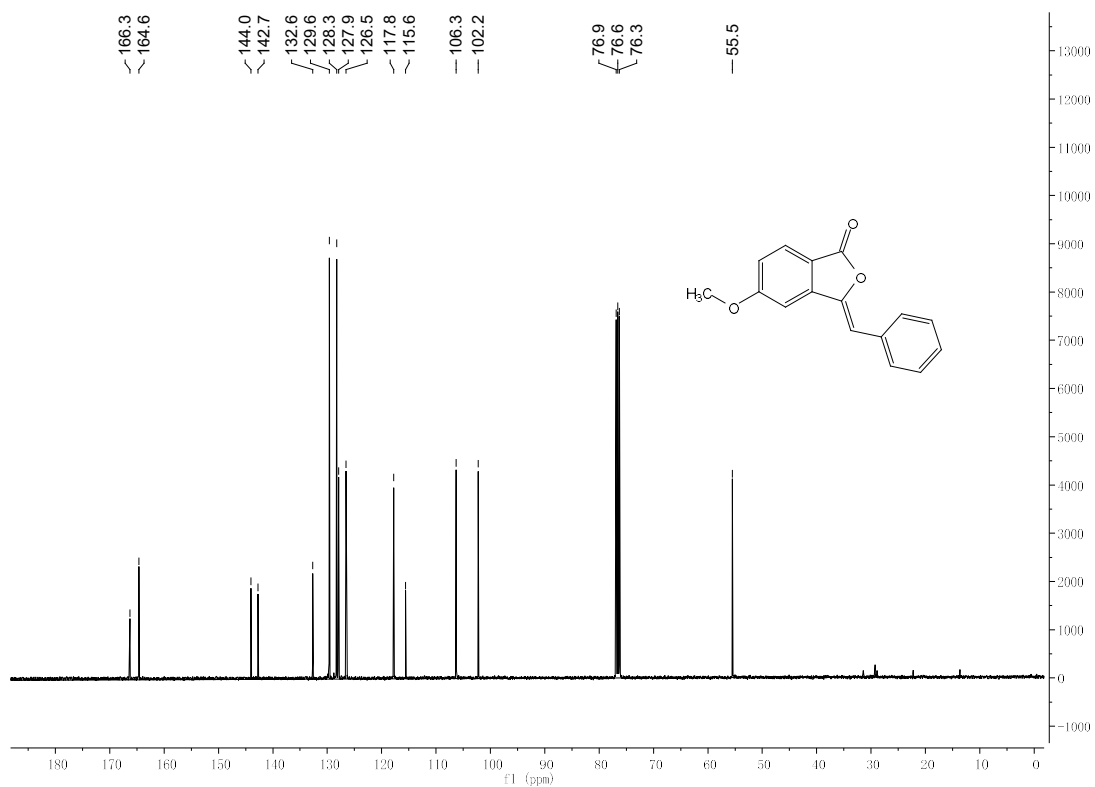

**<sup>13</sup>C NMR Spectrum of Compound 5i**
